# Supplementary material
Source: publisher figshare collection journal article supplement (https://acs.figshare.com/ndownloader/files/4477297)
Supplement: Supplementary file 1 [file 4477297]

data_General
_publ_requested_journal          Organometallics

#==============================================================================

# SUBMISSION DETAILS

_publ_contact_author_name        'Esteban P. Urriolabeitia'
_publ_contact_author_address     
'ICMA, CSIC-Universidad de Zaragoza, Pedro Cerbuna 12, 50009 Zaragoza (Spain)'
_publ_contact_author_email       esteban@unizar.es
_publ_contact_author_phone       (+34)976762302
_publ_contact_author_fax         (+34)976761187
loop_
_publ_author_name
_publ_author_address
'Roiban, Gheorghe-Doru'
;Organic Chemistry Department, Faculty of Chemistry and Chemical Engineering, 
BabesBolyai University, Arany Janos 11, 400028, Cluj Napoca, Romania.
; 
'Serrano, Elena'
;ICMA, CSIC-Universidad de Zaragoza, Pedro Cerbuna 12, 50009 Zaragoza (Spain)
; 
'Soler, Tatiana'
;Servicios Centrales de Investigacion, Facultad Ciencias, 03690 Alicante (Spain)
; 
'Contel, Maria'
;Brooklyn College and The Graduate Center (CUNY) 2900 Bedford Avenue, Brooklyn, 
New York 11210, (USA)
; 
'Grosu, Ion'
;Organic Chemistry Department, Faculty of Chemistry and Chemical Engineering, 
BabesBolyai University, Arany Janos 11, 400028, Cluj Napoca, Romania.
; 
'Cativiela, Carlos'
;ICMA, CSIC-Universidad de Zaragoza, Pedro Cerbuna 12, 50009 Zaragoza (Spain)
; 
_audit_creation_method            SHELXL-97 
#==============================================================================

data___9

#==============================================================================
_audit_creation_method            SHELXL-97 
_chemical_name_systematic 
; 
 ? 
; 
_chemical_name_common             ? 
_chemical_melting_point           ? 
_chemical_formula_moiety          
 'C68 H50 Br2 N2 O4 P2 Pd2, C Cl3'  
_chemical_formula_sum 
 'C69 H50 Br2 Cl3 N2 O4 P2 Pd2' 
_chemical_formula_weight          1512.02 
 
loop_ 
 _atom_type_symbol 
 _atom_type_description 
 _atom_type_scat_dispersion_real 
 _atom_type_scat_dispersion_imag 
 _atom_type_scat_source 
 'C'  'C'   0.0033   0.0016 
 'International Tables Vol C Tables 4.2.6.8 and 6.1.1.4' 
 'H'  'H'   0.0000   0.0000 
 'International Tables Vol C Tables 4.2.6.8 and 6.1.1.4' 
 'N'  'N'   0.0061   0.0033 
 'International Tables Vol C Tables 4.2.6.8 and 6.1.1.4' 
 'O'  'O'   0.0106   0.0060 
 'International Tables Vol C Tables 4.2.6.8 and 6.1.1.4' 
 'P'  'P'   0.1023   0.0942 
 'International Tables Vol C Tables 4.2.6.8 and 6.1.1.4' 
 'Br'  'Br'  -0.2901   2.4595 
 'International Tables Vol C Tables 4.2.6.8 and 6.1.1.4' 
 'Pd'  'Pd'  -0.9988   1.0072 
 'International Tables Vol C Tables 4.2.6.8 and 6.1.1.4' 
 'Cl'  'Cl'   0.1484   0.1585 
 'International Tables Vol C Tables 4.2.6.8 and 6.1.1.4' 
 
_symmetry_cell_setting            monoclinic 
_symmetry_space_group_name_H-M    'C 2/c'
 
loop_ 
 _symmetry_equiv_pos_as_xyz 
 'x, y, z' 
 '-x, y, -z+1/2' 
 'x+1/2, y+1/2, z' 
 '-x+1/2, y+1/2, -z+1/2' 
 '-x, -y, -z' 
 'x, -y, z-1/2' 
 '-x+1/2, -y+1/2, -z' 
 'x+1/2, -y+1/2, z-1/2' 
 
_cell_length_a                    27.885(17) 
_cell_length_b                    16.233(2) 
_cell_length_c                    19.01(3) 
_cell_angle_alpha                 90.00 
_cell_angle_beta                  129.77(14) 
_cell_angle_gamma                 90.00 
_cell_volume                      6615(18) 
_cell_formula_units_Z             4 
_cell_measurement_temperature     150(1) 
_cell_measurement_reflns_used     5318
_cell_measurement_theta_min       2.9131
_cell_measurement_theta_max       22.2995

 
_exptl_crystal_description        block
_exptl_crystal_colour             yellow
_exptl_crystal_size_max           0.22
_exptl_crystal_size_mid           0.18
_exptl_crystal_size_min           0.06
_exptl_crystal_density_meas       ? 
_exptl_crystal_density_diffrn     1.518 
_exptl_crystal_density_method     'not measured' 
_exptl_crystal_F_000              3012 
_exptl_absorpt_coefficient_mu     1.969 
_exptl_absorpt_correction_type    'multi-scan'
_exptl_absorpt_correction_T_min   0.862 
_exptl_absorpt_correction_T_max   0.888 
_exptl_absorpt_process_details
;
CrysAlis RED, Oxford Diffraction Ltd.,
Version 1.171.32.19 (release 28-02-2008 CrysAlis171 .NET)
(compiled Feb 28 2008,12:10:31)
Empirical absorption correction using spherical harmonics,
 implemented in SCALE3 ABSPACK scaling algorithm.
;

 
_exptl_special_details 
; 
 ? 
; 
 
_diffrn_ambient_temperature       150(1) 
_diffrn_radiation_wavelength 0.7107
_diffrn_radiation_type 'Mo K\a'
_diffrn_radiation_source 'Enhance (Mo) X-ray Source'
_diffrn_radiation_monochromator 'graphite'
_diffrn_measurement_device_type   'Oxford Diffraction Xcalibur2' 
_diffrn_measurement_method        '\w and \f scans' 
_diffrn_detector_area_resol_mean  16.3990
_diffrn_standards_number          ? 
_diffrn_standards_interval_count  ? 
_diffrn_standards_interval_time   ? 
_diffrn_standards_decay_%         ? 
_diffrn_reflns_number             24616 
_diffrn_reflns_av_R_equivalents   0.0688 
_diffrn_reflns_av_sigmaI/netI     0.1117 
_diffrn_reflns_limit_h_min        -33 
_diffrn_reflns_limit_h_max        30 
_diffrn_reflns_limit_k_min        -19 
_diffrn_reflns_limit_k_max        19 
_diffrn_reflns_limit_l_min        -20 
_diffrn_reflns_limit_l_max        22 
_diffrn_reflns_theta_min          2.56 
_diffrn_reflns_theta_max          25.00 
_reflns_number_total              5810 
_reflns_number_gt                 3120 
_reflns_threshold_expression      'I>2\s(I)' 
 
_computing_data_collection
;
CrysAlis CCD, Oxford Diffraction Ltd.,
Version 1.171.32.19 (release 28-02-2008 CrysAlis171 .NET)
(compiled Feb 28 2008,12:10:31)
;
_computing_cell_refinement
;
CrysAlis RED, Oxford Diffraction Ltd.,
Version 1.171.32.19 (release 28-02-2008 CrysAlis171 .NET)
(compiled Feb 28 2008,12:10:31)
;
_computing_data_reduction
;
CrysAlis RED, Oxford Diffraction Ltd.,
Version 1.171.32.19 (release 28-02-2008 CrysAlis171 .NET)
(compiled Feb 28 2008,12:10:31)
;

_computing_structure_solution
;
SHELXL-97 (Sheldrick, Acta Cryst. 2008, A64, 112-122) 
;
_computing_structure_refinement   
;
SHELXL-97 (Sheldrick, Acta Cryst. 2008, A64, 112-122) 
;
_computing_molecular_graphics     
;
SHELXTL  Rel. 6.12/V (Sheldrick, Acta Cryst. 2008, A64, 112-122)
;
_computing_publication_material    
;
SHELX-97 (Sheldrick, Acta Cryst. 2008, A64, 112-122)' 
;
 
 
_refine_special_details 
; 
 Refinement of F^2^ against ALL reflections.  The weighted R-factor wR and 
 goodness of fit S are based on F^2^, conventional R-factors R are based 
 on F, with F set to zero for negative F^2^. The threshold expression of 
 F^2^ > 2sigma(F^2^) is used only for calculating R-factors(gt) etc. and is 
 not relevant to the choice of reflections for refinement.  R-factors based 
 on F^2^ are statistically about twice as large as those based on F, and R- 
 factors based on ALL data will be even larger. 
; 
 
_refine_ls_structure_factor_coef  Fsqd  
_refine_ls_matrix_type            full 
_refine_ls_weighting_scheme       calc  
_refine_ls_weighting_details 
 'calc w=1/[\s^2^(Fo^2^)+(0.0351P)^2^] where P=(Fo^2^+2Fc^2^)/3' 
_atom_sites_solution_primary      direct 
_atom_sites_solution_secondary    difmap 
_atom_sites_solution_hydrogens    geom 
_refine_ls_hydrogen_treatment     constr 
_refine_ls_extinction_method      none 
_refine_ls_extinction_coef        ? 
_refine_ls_number_reflns          5810 
_refine_ls_number_parameters      397 
_refine_ls_number_restraints      0 
_refine_ls_R_factor_all           0.0949 
_refine_ls_R_factor_gt            0.0476 
_refine_ls_wR_factor_ref          0.1006 
_refine_ls_wR_factor_gt           0.0959 
_refine_ls_goodness_of_fit_ref    1.006 
_refine_ls_restrained_S_all       1.006 
_refine_ls_shift/su_max           0.038 
_refine_ls_shift/su_mean          0.002 
 
loop_ 
 _atom_site_label 
 _atom_site_type_symbol 
 _atom_site_fract_x 
 _atom_site_fract_y 
 _atom_site_fract_z 
 _atom_site_U_iso_or_equiv 
 _atom_site_adp_type 
 _atom_site_occupancy 
 _atom_site_symmetry_multiplicity 
 _atom_site_calc_flag 
 _atom_site_refinement_flags 
 _atom_site_disorder_assembly 
 _atom_site_disorder_group 
Pd1 Pd 0.07093(2) 0.04365(3) 0.52735(3) 0.04044(17) Uani 1 1 d . . . 
Br1 Br 0.04487(3) -0.06645(4) 0.59457(5) 0.0562(2) Uani 1 1 d . . . 
P1 P 0.17528(7) 0.03441(10) 0.63513(11) 0.0401(4) Uani 1 1 d . . . 
N1 N 0.0886(2) 0.3917(4) 0.5383(4) 0.0608(17) Uani 1 1 d . . . 
O1 O 0.0822(2) 0.4182(3) 0.6489(4) 0.0817(16) Uani 1 1 d . . . 
O2 O 0.0808(3) 0.2894(4) 0.6922(4) 0.1008(19) Uani 1 1 d . . . 
C1 C 0.0833(2) 0.1236(4) 0.4597(4) 0.0423(16) Uani 1 1 d . . . 
C2 C 0.0823(3) 0.0931(4) 0.3901(5) 0.0550(19) Uani 1 1 d . . . 
H2A H 0.0797 0.0367 0.3796 0.066 Uiso 1 1 calc R . . 
C3 C 0.0851(3) 0.1479(6) 0.3367(5) 0.072(2) Uani 1 1 d . . . 
H3A H 0.0848 0.1283 0.2904 0.086 Uiso 1 1 calc R . . 
C4 C 0.0885(3) 0.2310(5) 0.3527(5) 0.071(2) Uani 1 1 d . . . 
H4A H 0.0900 0.2673 0.3164 0.086 Uiso 1 1 calc R . . 
C5 C 0.0896(3) 0.2615(4) 0.4209(5) 0.061(2) Uani 1 1 d . . . 
H5A H 0.0923 0.3181 0.4304 0.074 Uiso 1 1 calc R . . 
C6 C 0.0869(2) 0.2096(4) 0.4758(5) 0.0420(16) Uani 1 1 d . . . 
C7 C 0.0882(2) 0.2391(4) 0.5462(4) 0.0472(17) Uani 1 1 d . . . 
H7A H 0.0894 0.1982 0.5815 0.057 Uiso 1 1 calc R . . 
C8 C 0.0880(3) 0.3158(4) 0.5715(5) 0.0528(18) Uani 1 1 d . . . 
C9 C 0.0837(3) 0.3324(5) 0.6417(6) 0.068(2) Uani 1 1 d . . . 
C10 C 0.0841(3) 0.4485(5) 0.5833(6) 0.067(2) Uani 1 1 d . . . 
C11 C 0.0811(3) 0.5363(5) 0.5758(7) 0.081(3) Uani 1 1 d . . . 
C12 C 0.0767(3) 0.5856(5) 0.6303(7) 0.119(4) Uani 1 1 d . . . 
H12A H 0.0776 0.5626 0.6760 0.143 Uiso 1 1 calc R . . 
C13 C 0.0710(4) 0.6670(8) 0.6167(10) 0.142(5) Uani 1 1 d . . . 
H13A H 0.0676 0.7010 0.6527 0.170 Uiso 1 1 calc R . . 
C14 C 0.0702(5) 0.7009(6) 0.5486(10) 0.139(7) Uani 1 1 d . . . 
H14A H 0.0663 0.7576 0.5398 0.167 Uiso 1 1 calc R . . 
C15 C 0.0751(5) 0.6524(7) 0.4939(7) 0.138(5) Uani 1 1 d . . . 
H15A H 0.0746 0.6750 0.4484 0.166 Uiso 1 1 calc R . . 
C16 C 0.0808(4) 0.5701(6) 0.5097(7) 0.117(4) Uani 1 1 d . . . 
H16A H 0.0846 0.5356 0.4745 0.141 Uiso 1 1 calc R . . 
C17 C 0.2219(2) 0.1223(4) 0.6507(4) 0.0451(17) Uani 1 1 d . . . 
C18 C 0.2350(3) 0.1314(4) 0.5920(4) 0.0593(19) Uani 1 1 d . . . 
H18A H 0.2210 0.0929 0.5463 0.071 Uiso 1 1 calc R . . 
C19 C 0.2700(3) 0.2000(6) 0.6033(6) 0.086(3) Uani 1 1 d . . . 
H19A H 0.2799 0.2073 0.5655 0.104 Uiso 1 1 calc R . . 
C20 C 0.2898(4) 0.2575(5) 0.6723(7) 0.096(3) Uani 1 1 d . . . 
H20A H 0.3132 0.3027 0.6800 0.115 Uiso 1 1 calc R . . 
C21 C 0.2753(3) 0.2487(4) 0.7283(6) 0.077(2) Uani 1 1 d . . . 
H21A H 0.2877 0.2879 0.7727 0.093 Uiso 1 1 calc R . . 
C22 C 0.2426(3) 0.1816(4) 0.7173(5) 0.0544(18) Uani 1 1 d . . . 
H22A H 0.2334 0.1747 0.7562 0.065 Uiso 1 1 calc R . . 
C23 C 0.2002(3) 0.0200(3) 0.7493(4) 0.0423(16) Uani 1 1 d . . . 
C24 C 0.1689(3) 0.0607(4) 0.7723(5) 0.0525(18) Uani 1 1 d . . . 
H24A H 0.1340 0.0920 0.7285 0.063 Uiso 1 1 calc R . . 
C25 C 0.1888(3) 0.0557(4) 0.8600(6) 0.068(2) Uani 1 1 d . . . 
H25A H 0.1676 0.0835 0.8755 0.081 Uiso 1 1 calc R . . 
C26 C 0.2406(4) 0.0089(5) 0.9240(6) 0.085(3) Uani 1 1 d . . . 
H26A H 0.2549 0.0058 0.9835 0.102 Uiso 1 1 calc R . . 
C27 C 0.2707(4) -0.0323(5) 0.9011(6) 0.085(2) Uani 1 1 d . . . 
H27A H 0.3054 -0.0642 0.9447 0.102 Uiso 1 1 calc R . . 
C28 C 0.2507(3) -0.0276(4) 0.8142(5) 0.0616(19) Uani 1 1 d . . . 
H28A H 0.2715 -0.0570 0.7990 0.074 Uiso 1 1 calc R . . 
C29 C 0.2071(3) -0.0514(4) 0.6169(4) 0.0499(17) Uani 1 1 d . . . 
C30 C 0.1703(4) -0.1169(5) 0.5669(5) 0.085(3) Uani 1 1 d . . . 
H30A H 0.1283 -0.1158 0.5397 0.102 Uiso 1 1 calc R . . 
C31 C 0.1949(5) -0.1863(5) 0.5556(7) 0.121(4) Uani 1 1 d . . . 
H31A H 0.1693 -0.2311 0.5217 0.145 Uiso 1 1 calc R . . 
C32 C 0.2563(5) -0.1879(7) 0.5945(7) 0.107(4) Uani 1 1 d . . . 
H32A H 0.2731 -0.2344 0.5886 0.129 Uiso 1 1 calc R . . 
C33 C 0.2923(4) -0.1225(7) 0.6409(6) 0.095(3) Uani 1 1 d . . . 
H33A H 0.3335 -0.1225 0.6645 0.114 Uiso 1 1 calc R . . 
C34 C 0.2691(3) -0.0554(5) 0.6544(4) 0.070(2) Uani 1 1 d . . . 
H34A H 0.2956 -0.0115 0.6893 0.085 Uiso 1 1 calc R . . 
C35 C 0.0227(11) 0.4851(11) 0.747(2) 0.155(11) Uani 0.50 1 d P . . 
Cl1 Cl -0.0159(4) 0.5727(3) 0.7123(4) 0.165(3) Uani 0.50 1 d P . . 
Cl2 Cl 0.0996(3) 0.4918(5) 0.8447(4) 0.177(3) Uani 0.50 1 d P . . 
Cl3 Cl -0.0182(2) 0.4099(4) 0.7560(4) 0.1173(18) Uani 0.50 1 d P . . 
 
loop_ 
 _atom_site_aniso_label 
 _atom_site_aniso_U_11 
 _atom_site_aniso_U_22 
 _atom_site_aniso_U_33 
 _atom_site_aniso_U_23 
 _atom_site_aniso_U_13 
 _atom_site_aniso_U_12 
Pd1 0.0313(3) 0.0380(3) 0.0441(3) 0.0024(2) 0.0204(2) -0.0064(2) 
Br1 0.0359(4) 0.0518(4) 0.0616(5) 0.0185(4) 0.0224(4) -0.0056(3) 
P1 0.0325(9) 0.0478(10) 0.0369(10) -0.0017(9) 0.0208(8) -0.0030(7) 
N1 0.042(3) 0.051(4) 0.060(4) -0.004(3) 0.019(3) -0.010(3) 
O1 0.078(4) 0.065(4) 0.082(4) -0.033(3) 0.042(3) -0.012(3) 
O2 0.140(5) 0.091(4) 0.079(5) -0.020(3) 0.073(4) -0.021(4) 
C1 0.035(4) 0.058(4) 0.036(4) -0.002(3) 0.023(3) -0.008(3) 
C2 0.042(4) 0.072(5) 0.055(5) -0.008(4) 0.033(4) -0.014(3) 
C3 0.048(4) 0.121(7) 0.053(5) -0.011(5) 0.036(4) -0.028(5) 
C4 0.070(5) 0.083(6) 0.058(6) 0.003(5) 0.040(5) -0.032(4) 
C5 0.053(5) 0.068(5) 0.054(5) 0.004(4) 0.030(4) -0.015(4) 
C6 0.032(4) 0.042(4) 0.045(4) 0.002(4) 0.022(3) -0.009(3) 
C7 0.045(4) 0.042(4) 0.043(5) -0.004(3) 0.022(4) -0.004(3) 
C8 0.045(4) 0.055(5) 0.040(5) -0.001(4) 0.018(4) -0.010(3) 
C9 0.068(5) 0.052(6) 0.054(6) -0.002(4) 0.026(5) -0.012(4) 
C10 0.046(4) 0.072(6) 0.052(5) -0.001(5) 0.017(4) -0.015(4) 
C11 0.044(4) 0.029(5) 0.095(7) -0.004(5) 0.010(5) -0.005(3) 
C12 0.065(6) 0.035(5) 0.177(11) -0.035(6) 0.040(6) -0.006(4) 
C13 0.054(6) 0.101(11) 0.173(14) -0.052(9) 0.028(8) -0.014(6) 
C14 0.057(6) 0.038(6) 0.187(15) -0.017(8) 0.016(8) -0.009(5) 
C15 0.142(10) 0.070(8) 0.111(9) -0.013(7) 0.039(8) -0.039(7) 
C16 0.096(7) 0.044(6) 0.115(9) 0.001(6) 0.023(7) -0.011(5) 
C17 0.028(3) 0.067(4) 0.038(4) -0.002(4) 0.020(3) -0.014(3) 
C18 0.048(4) 0.088(5) 0.045(5) -0.009(4) 0.031(4) -0.018(4) 
C19 0.059(5) 0.126(8) 0.092(7) 0.018(6) 0.056(5) -0.017(5) 
C20 0.065(6) 0.068(6) 0.136(9) -0.009(6) 0.055(6) -0.031(4) 
C21 0.079(6) 0.072(6) 0.102(7) -0.023(5) 0.068(6) -0.036(4) 
C22 0.045(4) 0.073(5) 0.054(5) -0.007(4) 0.036(4) -0.014(4) 
C23 0.032(4) 0.048(4) 0.047(4) -0.006(3) 0.026(4) -0.010(3) 
C24 0.051(4) 0.065(5) 0.047(5) -0.003(4) 0.033(4) 0.000(3) 
C25 0.069(5) 0.084(6) 0.073(6) -0.014(5) 0.056(5) -0.012(4) 
C26 0.093(7) 0.120(7) 0.052(6) 0.002(5) 0.051(6) -0.011(6) 
C27 0.077(6) 0.123(7) 0.055(6) 0.021(5) 0.043(5) 0.025(5) 
C28 0.056(5) 0.084(5) 0.043(5) 0.009(4) 0.031(4) 0.012(4) 
C29 0.049(4) 0.066(5) 0.028(4) -0.009(4) 0.021(3) -0.003(4) 
C30 0.072(6) 0.088(6) 0.087(7) -0.013(5) 0.047(5) 0.016(5) 
C31 0.143(10) 0.068(6) 0.125(9) -0.037(6) 0.073(8) 0.011(6) 
C32 0.112(9) 0.128(9) 0.085(8) 0.018(7) 0.064(7) 0.068(7) 
C33 0.068(6) 0.142(9) 0.055(6) -0.006(6) 0.031(5) 0.032(6) 
C34 0.052(5) 0.100(6) 0.041(5) -0.011(4) 0.022(4) 0.019(4) 
C35 0.16(3) 0.048(11) 0.28(3) 0.042(17) 0.15(3) 0.006(12) 
Cl1 0.171(8) 0.102(4) 0.118(6) 0.010(3) 0.045(6) 0.041(4) 
Cl2 0.097(4) 0.315(9) 0.088(4) -0.039(5) 0.046(4) 0.018(5) 
Cl3 0.106(5) 0.135(4) 0.135(5) -0.003(4) 0.088(4) 0.007(3) 
 
_geom_special_details 
; 
 All esds (except the esd in the dihedral angle between two l.s. planes) 
 are estimated using the full covariance matrix.  The cell esds are taken 
 into account individually in the estimation of esds in distances, angles 
 and torsion angles; correlations between esds in cell parameters are only 
 used when they are defined by crystal symmetry.  An approximate (isotropic) 
 treatment of cell esds is used for estimating esds involving l.s. planes. 
; 
 
loop_ 
 _geom_bond_atom_site_label_1 
 _geom_bond_atom_site_label_2 
 _geom_bond_distance 
 _geom_bond_site_symmetry_2 
 _geom_bond_publ_flag 
Pd1 C1 2.007(6) . ? 
Pd1 P1 2.249(5) . ? 
Pd1 Br1 2.522(6) 5_556 ? 
Pd1 Br1 2.5582(15) . ? 
Br1 Pd1 2.522(6) 5_556 ? 
P1 C29 1.799(7) . ? 
P1 C17 1.823(6) . ? 
P1 C23 1.823(7) . ? 
N1 C10 1.318(9) . ? 
N1 C8 1.389(8) . ? 
O1 C10 1.373(8) . ? 
O1 C9 1.402(8) . ? 
O2 C9 1.232(8) . ? 
C1 C2 1.396(8) . ? 
C1 C6 1.417(8) . ? 
C2 C3 1.391(9) . ? 
C2 H2A 0.9300 . ? 
C3 C4 1.373(9) . ? 
C3 H3A 0.9300 . ? 
C4 C5 1.370(9) . ? 
C4 H4A 0.9300 . ? 
C5 C6 1.380(8) . ? 
C5 H5A 0.9300 . ? 
C6 C7 1.402(8) . ? 
C7 C8 1.336(8) . ? 
C7 H7A 0.9300 . ? 
C8 C9 1.439(10) . ? 
C10 C11 1.429(10) . ? 
C11 C16 1.366(13) . ? 
C11 C12 1.376(12) . ? 
C12 C13 1.335(13) . ? 
C12 H12A 0.9300 . ? 
C13 C14 1.395(16) . ? 
C13 H13A 0.9300 . ? 
C14 C15 1.378(16) . ? 
C14 H14A 0.9300 . ? 
C15 C16 1.356(12) . ? 
C15 H15A 0.9300 . ? 
C16 H16A 0.9300 . ? 
C17 C18 1.386(8) . ? 
C17 C22 1.388(8) . ? 
C18 C19 1.403(9) . ? 
C18 H18A 0.9300 . ? 
C19 C20 1.403(11) . ? 
C19 H19A 0.9300 . ? 
C20 C21 1.366(11) . ? 
C20 H20A 0.9300 . ? 
C21 C22 1.349(8) . ? 
C21 H21A 0.9300 . ? 
C22 H22A 0.9300 . ? 
C23 C24 1.368(8) . ? 
C23 C28 1.372(8) . ? 
C24 C25 1.382(9) . ? 
C24 H24A 0.9300 . ? 
C25 C26 1.376(10) . ? 
C25 H25A 0.9300 . ? 
C26 C27 1.345(10) . ? 
C26 H26A 0.9300 . ? 
C27 C28 1.366(9) . ? 
C27 H27A 0.9300 . ? 
C28 H28A 0.9300 . ? 
C29 C30 1.356(9) . ? 
C29 C34 1.389(9) . ? 
C30 C31 1.405(10) . ? 
C30 H30A 0.9300 . ? 
C31 C32 1.364(12) . ? 
C31 H31A 0.9300 . ? 
C32 C33 1.334(11) . ? 
C32 H32A 0.9300 . ? 
C33 C34 1.371(10) . ? 
C33 H33A 0.9300 . ? 
C34 H34A 0.9300 . ? 
C35 Cl1 1.646(18) . ? 
C35 Cl2 1.72(3) . ? 
C35 Cl3 1.748(16) . ? 
 
loop_ 
 _geom_angle_atom_site_label_1 
 _geom_angle_atom_site_label_2 
 _geom_angle_atom_site_label_3 
 _geom_angle 
 _geom_angle_site_symmetry_1 
 _geom_angle_site_symmetry_3 
 _geom_angle_publ_flag 
C1 Pd1 P1 88.52(19) . . ? 
C1 Pd1 Br1 87.72(18) . 5_556 ? 
P1 Pd1 Br1 175.28(5) . 5_556 ? 
C1 Pd1 Br1 173.01(17) . . ? 
P1 Pd1 Br1 96.52(10) . . ? 
Br1 Pd1 Br1 87.47(8) 5_556 . ? 
Pd1 Br1 Pd1 92.53(8) 5_556 . ? 
C29 P1 C17 104.4(3) . . ? 
C29 P1 C23 105.7(3) . . ? 
C17 P1 C23 102.6(3) . . ? 
C29 P1 Pd1 112.7(2) . . ? 
C17 P1 Pd1 117.9(2) . . ? 
C23 P1 Pd1 112.2(2) . . ? 
C10 N1 C8 106.9(7) . . ? 
C10 O1 C9 104.2(6) . . ? 
C2 C1 C6 120.6(6) . . ? 
C2 C1 Pd1 118.0(5) . . ? 
C6 C1 Pd1 121.1(5) . . ? 
C3 C2 C1 119.2(7) . . ? 
C3 C2 H2A 120.4 . . ? 
C1 C2 H2A 120.4 . . ? 
C4 C3 C2 119.6(7) . . ? 
C4 C3 H3A 120.2 . . ? 
C2 C3 H3A 120.2 . . ? 
C3 C4 C5 121.5(7) . . ? 
C3 C4 H4A 119.3 . . ? 
C5 C4 H4A 119.2 . . ? 
C4 C5 C6 121.0(7) . . ? 
C4 C5 H5A 119.5 . . ? 
C6 C5 H5A 119.5 . . ? 
C5 C6 C7 122.2(6) . . ? 
C5 C6 C1 118.0(6) . . ? 
C7 C6 C1 119.8(6) . . ? 
C8 C7 C6 131.3(7) . . ? 
C8 C7 H7A 114.4 . . ? 
C6 C7 H7A 114.4 . . ? 
C7 C8 N1 131.2(8) . . ? 
C7 C8 C9 122.0(7) . . ? 
N1 C8 C9 106.7(7) . . ? 
O2 C9 O1 117.7(9) . . ? 
O2 C9 C8 134.7(8) . . ? 
O1 C9 C8 107.6(7) . . ? 
N1 C10 O1 114.5(7) . . ? 
N1 C10 C11 131.1(9) . . ? 
O1 C10 C11 114.4(9) . . ? 
C16 C11 C12 120.5(8) . . ? 
C16 C11 C10 117.2(10) . . ? 
C12 C11 C10 122.2(11) . . ? 
C13 C12 C11 119.1(12) . . ? 
C13 C12 H12A 120.4 . . ? 
C11 C12 H12A 120.4 . . ? 
C12 C13 C14 119.9(14) . . ? 
C12 C13 H13A 120.0 . . ? 
C14 C13 H13A 120.0 . . ? 
C15 C14 C13 121.7(12) . . ? 
C15 C14 H14A 119.2 . . ? 
C13 C14 H14A 119.2 . . ? 
C16 C15 C14 116.7(12) . . ? 
C16 C15 H15A 121.7 . . ? 
C14 C15 H15A 121.7 . . ? 
C15 C16 C11 122.1(11) . . ? 
C15 C16 H16A 119.0 . . ? 
C11 C16 H16A 119.0 . . ? 
C18 C17 C22 119.4(6) . . ? 
C18 C17 P1 118.7(5) . . ? 
C22 C17 P1 121.8(5) . . ? 
C17 C18 C19 118.4(7) . . ? 
C17 C18 H18A 120.8 . . ? 
C19 C18 H18A 120.8 . . ? 
C18 C19 C20 119.4(8) . . ? 
C18 C19 H19A 120.3 . . ? 
C20 C19 H19A 120.3 . . ? 
C21 C20 C19 121.5(7) . . ? 
C21 C20 H20A 119.2 . . ? 
C19 C20 H20A 119.2 . . ? 
C22 C21 C20 118.2(8) . . ? 
C22 C21 H21A 120.9 . . ? 
C20 C21 H21A 120.9 . . ? 
C21 C22 C17 123.1(7) . . ? 
C21 C22 H22A 118.5 . . ? 
C17 C22 H22A 118.5 . . ? 
C24 C23 C28 118.8(6) . . ? 
C24 C23 P1 119.0(5) . . ? 
C28 C23 P1 122.2(5) . . ? 
C23 C24 C25 120.7(6) . . ? 
C23 C24 H24A 119.6 . . ? 
C25 C24 H24A 119.6 . . ? 
C26 C25 C24 118.9(7) . . ? 
C26 C25 H25A 120.6 . . ? 
C24 C25 H25A 120.6 . . ? 
C27 C26 C25 120.5(8) . . ? 
C27 C26 H26A 119.8 . . ? 
C25 C26 H26A 119.8 . . ? 
C26 C27 C28 120.4(8) . . ? 
C26 C27 H27A 119.8 . . ? 
C28 C27 H27A 119.8 . . ? 
C27 C28 C23 120.7(7) . . ? 
C27 C28 H28A 119.7 . . ? 
C23 C28 H28A 119.7 . . ? 
C30 C29 C34 117.2(6) . . ? 
C30 C29 P1 119.9(5) . . ? 
C34 C29 P1 122.9(5) . . ? 
C29 C30 C31 120.9(8) . . ? 
C29 C30 H30A 119.6 . . ? 
C31 C30 H30A 119.6 . . ? 
C32 C31 C30 119.9(9) . . ? 
C32 C31 H31A 120.0 . . ? 
C30 C31 H31A 120.0 . . ? 
C33 C32 C31 119.6(9) . . ? 
C33 C32 H32A 120.2 . . ? 
C31 C32 H32A 120.2 . . ? 
C32 C33 C34 120.8(9) . . ? 
C32 C33 H33A 119.6 . . ? 
C34 C33 H33A 119.6 . . ? 
C33 C34 C29 121.5(7) . . ? 
C33 C34 H34A 119.3 . . ? 
C29 C34 H34A 119.3 . . ? 
Cl1 C35 Cl2 115.0(14) . . ? 
Cl1 C35 Cl3 110.1(11) . . ? 
Cl2 C35 Cl3 112.5(15) . . ? 
 
_diffrn_measured_fraction_theta_max    0.999 
_diffrn_reflns_theta_full              25.00 
_diffrn_measured_fraction_theta_full   0.999 
_refine_diff_density_max    1.104 
_refine_diff_density_min   -0.513 
_refine_diff_density_rms    0.087

# SQUEEZE RESULTS (APPEND TO CIF)
loop_
  _platon_squeeze_void_nr
  _platon_squeeze_void_average_x
  _platon_squeeze_void_average_y
  _platon_squeeze_void_average_z
  _platon_squeeze_void_volume
  _platon_squeeze_void_count_electrons
         1     0.000     0.155     0.750     139.2      21.6
         2     0.500     0.345     0.250     139.2      22.0
         3     0.500     0.655     0.750     139.2      21.6
         4     0.000     0.845     0.250     139.2      22.0
_platon_squeeze_details
; ?
;
#==============================================================================

data___14

#==============================================================================

_audit_creation_method            SHELXL-97 
_chemical_name_systematic 
; 
 ? 
; 
_chemical_name_common             ? 
_chemical_melting_point           ? 
_chemical_formula_moiety          
 'C36 H26 N2 O8 Pd2'  
_chemical_formula_sum 
 'C36 H26 N2 O8 Pd2' 
_chemical_formula_weight          827.39 
 
loop_ 
 _atom_type_symbol 
 _atom_type_description 
 _atom_type_scat_dispersion_real 
 _atom_type_scat_dispersion_imag 
 _atom_type_scat_source 
 'C'  'C'   0.0033   0.0016 
 'International Tables Vol C Tables 4.2.6.8 and 6.1.1.4' 
 'H'  'H'   0.0000   0.0000 
 'International Tables Vol C Tables 4.2.6.8 and 6.1.1.4' 
 'N'  'N'   0.0061   0.0033 
 'International Tables Vol C Tables 4.2.6.8 and 6.1.1.4' 
 'O'  'O'   0.0106   0.0060 
 'International Tables Vol C Tables 4.2.6.8 and 6.1.1.4' 
 'Pd'  'Pd'  -0.9988   1.0072 
 'International Tables Vol C Tables 4.2.6.8 and 6.1.1.4' 
 
_symmetry_cell_setting            Monoclinic 
_symmetry_space_group_name_H-M    'I 2/a'
 
loop_ 
 _symmetry_equiv_pos_as_xyz 
 'x, y, z' 
 '-x+1/2, y, -z' 
 'x+1/2, y+1/2, z+1/2' 
 '-x+1, y+1/2, -z+1/2' 
 '-x, -y, -z' 
 'x-1/2, -y, z' 
 '-x+1/2, -y+1/2, -z+1/2' 
 'x, -y+1/2, z+1/2' 
 
_cell_length_a                    14.642(3) 
_cell_length_b                    10.676(2) 
_cell_length_c                    20.021(4) 
_cell_angle_alpha                 90.00 
_cell_angle_beta                  92.61(3) 
_cell_angle_gamma                 90.00 
_cell_volume                      3126.5(11) 
_cell_formula_units_Z             4 
_cell_measurement_temperature     293(1) 
_cell_measurement_reflns_used     5481
_cell_measurement_theta_min       5.570 
_cell_measurement_theta_max       55.130 
 
_exptl_crystal_description        block 
_exptl_crystal_colour             red 
_exptl_crystal_size_max           0.183 
_exptl_crystal_size_mid           0.153 
_exptl_crystal_size_min           0.059 
_exptl_crystal_density_meas       ? 
_exptl_crystal_density_diffrn     1.758 
_exptl_crystal_density_method     'not measured' 
_exptl_crystal_F_000              1648 
_exptl_absorpt_coefficient_mu     1.209 
_exptl_absorpt_correction_type    'multi-scan'
_exptl_absorpt_correction_T_min   0.7430
_exptl_absorpt_correction_T_max   0.9311 
_exptl_absorpt_process_details
;
CrysAlis RED, Oxford Diffraction Ltd.,
Version 1.171.32.19 (release 28-02-2008 CrysAlis171 .NET)
(compiled Feb 28 2008,12:10:31)
Empirical absorption correction using spherical harmonics,
 implemented in SCALE3 ABSPACK scaling algorithm.
;
 
_exptl_special_details 
; 
 ? 
; 
 
_diffrn_ambient_temperature       293(1) 
_diffrn_radiation_wavelength      0.71073 
_diffrn_radiation_type            MoK\a 
_diffrn_radiation_source          'fine-focus sealed tube' 
_diffrn_radiation_monochromator   graphite 
_diffrn_measurement_device_type   ? 
_diffrn_measurement_method        ? 
_diffrn_detector_area_resol_mean  ? 
_diffrn_standards_number          ? 
_diffrn_standards_interval_count  ? 
_diffrn_standards_interval_time   ? 
_diffrn_standards_decay_%         ? 
_diffrn_reflns_number             14242 
_diffrn_reflns_av_R_equivalents   0.0188 
_diffrn_reflns_av_sigmaI/netI     0.0137 
_diffrn_reflns_limit_h_min        -18 
_diffrn_reflns_limit_h_max        19 
_diffrn_reflns_limit_k_min        -13 
_diffrn_reflns_limit_k_max        13 
_diffrn_reflns_limit_l_min        -26 
_diffrn_reflns_limit_l_max        25 
_diffrn_reflns_theta_min          2.04 
_diffrn_reflns_theta_max          27.57 
_reflns_number_total              3614 
_reflns_number_gt                 3402 
_reflns_threshold_expression      'I>2\s(I)' 
 
_computing_data_collection
;
CrysAlis CCD, Oxford Diffraction Ltd.,
Version 1.171.32.19 (release 28-02-2008 CrysAlis171 .NET)
(compiled Feb 28 2008,12:10:31)
;
_computing_cell_refinement
;
CrysAlis RED, Oxford Diffraction Ltd.,
Version 1.171.32.19 (release 28-02-2008 CrysAlis171 .NET)
(compiled Feb 28 2008,12:10:31)
;
_computing_data_reduction
;
CrysAlis RED, Oxford Diffraction Ltd.,
Version 1.171.32.19 (release 28-02-2008 CrysAlis171 .NET)
(compiled Feb 28 2008,12:10:31)
;

_computing_structure_solution
;
SHELXL-97 (Sheldrick, Acta Cryst. 2008, A64, 112-122) 
;
_computing_structure_refinement   
;
SHELXL-97 (Sheldrick, Acta Cryst. 2008, A64, 112-122) 
;
_computing_molecular_graphics     
;
SHELXTL  Rel. 6.12/V (Sheldrick, Acta Cryst. 2008, A64, 112-122)
;
_computing_publication_material    
;
SHELX-97 (Sheldrick, Acta Cryst. 2008, A64, 112-122)' 
;
  
_refine_special_details 
; 
 Refinement of F^2^ against ALL reflections.  The weighted R-factor wR and 
 goodness of fit S are based on F^2^, conventional R-factors R are based 
 on F, with F set to zero for negative F^2^. The threshold expression of 
 F^2^ > 2sigma(F^2^) is used only for calculating R-factors(gt) etc. and is 
 not relevant to the choice of reflections for refinement.  R-factors based 
 on F^2^ are statistically about twice as large as those based on F, and R- 
 factors based on ALL data will be even larger. 
; 
 
_refine_ls_structure_factor_coef  Fsqd  
_refine_ls_matrix_type            full 
_refine_ls_weighting_scheme       calc  
_refine_ls_weighting_details 
 'calc w=1/[\s^2^(Fo^2^)+(0.0360P)^2^+2.6851P] where P=(Fo^2^+2Fc^2^)/3' 
_atom_sites_solution_primary      direct 
_atom_sites_solution_secondary    difmap 
_atom_sites_solution_hydrogens    geom 
_refine_ls_hydrogen_treatment     mixed
_refine_ls_extinction_method      SHELXL 
_refine_ls_extinction_coef        0.00059(7) 
_refine_ls_extinction_expression 
 'Fc^*^=kFc[1+0.001xFc^2^\l^3^/sin(2\q)]^-1/4^' 
_refine_ls_number_reflns          3614 
_refine_ls_number_parameters      270 
_refine_ls_number_restraints      0 
_refine_ls_R_factor_all           0.0213 
_refine_ls_R_factor_gt            0.0203 
_refine_ls_wR_factor_ref          0.0542 
_refine_ls_wR_factor_gt           0.0537 
_refine_ls_goodness_of_fit_ref    1.042 
_refine_ls_restrained_S_all       1.042 
_refine_ls_shift/su_max           0.001 
_refine_ls_shift/su_mean          0.000 
 
loop_ 
 _atom_site_label 
 _atom_site_type_symbol 
 _atom_site_fract_x 
 _atom_site_fract_y 
 _atom_site_fract_z 
 _atom_site_U_iso_or_equiv 
 _atom_site_adp_type 
 _atom_site_occupancy 
 _atom_site_symmetry_multiplicity 
 _atom_site_calc_flag 
 _atom_site_refinement_flags 
 _atom_site_disorder_assembly 
 _atom_site_disorder_group 
Pd1 Pd 0.166176(7) 0.265581(11) 0.037513(6) 0.01375(6) Uani 1 1 d . . . 
O3 O 0.23430(8) 0.14033(10) 0.09895(5) 0.0177(2) Uani 1 1 d . . . 
N1 N 0.10072(9) 0.38643(12) -0.02728(7) 0.0161(3) Uani 1 1 d . . . 
O4 O 0.15520(7) 0.10736(10) -0.02690(6) 0.0173(2) Uani 1 1 d . . . 
O2 O 0.08735(9) 0.67666(12) -0.10731(7) 0.0282(3) Uani 1 1 d . . . 
O1 O 0.05182(8) 0.47177(11) -0.12442(6) 0.0206(2) Uani 1 1 d . . . 
C1 C 0.17826(10) 0.39574(15) 0.10739(8) 0.0176(3) Uani 1 1 d . . . 
C11 C 0.01769(12) 0.25491(15) -0.11365(9) 0.0187(3) Uani 1 1 d . . . 
C17 C 0.29957(10) 0.07812(14) 0.07578(8) 0.0165(3) Uani 1 1 d . . . 
C8 C 0.11865(10) 0.51543(15) -0.02311(8) 0.0170(3) Uani 1 1 d . . . 
C7 C 0.15347(11) 0.57804(16) 0.03035(8) 0.0182(3) Uani 1 1 d . . . 
C9 C 0.08768(11) 0.57225(15) -0.08624(9) 0.0206(3) Uani 1 1 d . . . 
C15 C -0.06684(12) 0.06456(17) -0.09938(10) 0.0253(4) Uani 1 1 d . . . 
C3 C 0.21069(14) 0.44231(18) 0.22466(9) 0.0282(4) Uani 1 1 d . . . 
C6 C 0.17760(10) 0.52560(15) 0.09491(8) 0.0175(3) Uani 1 1 d . . . 
C2 C 0.19390(12) 0.35720(16) 0.17338(9) 0.0229(3) Uani 1 1 d . . . 
C10 C 0.06002(10) 0.36731(15) -0.08557(8) 0.0172(3) Uani 1 1 d . . . 
C5 C 0.19666(12) 0.61114(17) 0.14697(9) 0.0224(3) Uani 1 1 d . . . 
C12 C 0.01057(14) 0.23953(17) -0.18276(10) 0.0248(4) Uani 1 1 d . . . 
C16 C -0.02116(11) 0.16710(16) -0.07191(9) 0.0199(3) Uani 1 1 d . . . 
C13 C -0.03425(13) 0.13594(19) -0.20970(10) 0.0304(4) Uani 1 1 d . . . 
C14 C -0.07307(13) 0.04902(18) -0.16805(10) 0.0299(4) Uani 1 1 d . . . 
C4 C 0.21338(14) 0.57011(17) 0.21153(9) 0.0277(4) Uani 1 1 d . . . 
C18 C 0.32561(13) -0.04194(17) 0.11112(10) 0.0250(4) Uani 1 1 d . . . 
H4 H 0.2234(15) 0.626(2) 0.2450(10) 0.025(5) Uiso 1 1 d . . . 
H2 H 0.1935(18) 0.274(2) 0.1815(13) 0.033(6) Uiso 1 1 d . . . 
H14 H -0.1035(14) -0.021(2) -0.1871(10) 0.027(5) Uiso 1 1 d . . . 
H16 H -0.0191(14) 0.178(2) -0.0272(11) 0.024(5) Uiso 1 1 d . . . 
H13 H -0.0407(15) 0.127(2) -0.2550(11) 0.029(5) Uiso 1 1 d . . . 
H7 H 0.1597(14) 0.662(2) 0.0252(10) 0.028(6) Uiso 1 1 d . . . 
H12 H 0.0360(15) 0.299(2) -0.2082(11) 0.025(5) Uiso 1 1 d . . . 
H5 H 0.1965(15) 0.696(2) 0.1364(11) 0.030(6) Uiso 1 1 d . . . 
H15 H -0.0926(14) 0.010(2) -0.0710(10) 0.025(5) Uiso 1 1 d . . . 
H19 H 0.2775(16) -0.073(2) 0.1351(11) 0.031(6) Uiso 1 1 d . . . 
H20 H 0.3422(19) -0.102(3) 0.0796(13) 0.053(8) Uiso 1 1 d . . . 
H18 H 0.374(2) -0.025(3) 0.1405(14) 0.059(8) Uiso 1 1 d . . . 
H21 H 0.2168(15) 0.412(2) 0.2679(11) 0.025(5) Uiso 1 1 d . . . 
 
loop_ 
 _atom_site_aniso_label 
 _atom_site_aniso_U_11 
 _atom_site_aniso_U_22 
 _atom_site_aniso_U_33 
 _atom_site_aniso_U_23 
 _atom_site_aniso_U_13 
 _atom_site_aniso_U_12 
Pd1 0.01417(8) 0.01088(8) 0.01612(8) -0.00020(4) -0.00024(5) 0.00092(4) 
O3 0.0206(5) 0.0133(5) 0.0188(5) 0.0005(4) -0.0005(4) 0.0025(4) 
N1 0.0156(6) 0.0126(6) 0.0201(6) 0.0003(5) 0.0009(5) -0.0001(5) 
O4 0.0173(5) 0.0140(5) 0.0204(5) -0.0023(4) -0.0013(4) -0.0004(4) 
O2 0.0361(7) 0.0164(6) 0.0312(7) 0.0075(5) -0.0067(5) -0.0022(5) 
O1 0.0240(6) 0.0165(6) 0.0206(6) 0.0036(4) -0.0043(4) -0.0024(5) 
C1 0.0156(7) 0.0159(7) 0.0213(8) -0.0020(6) 0.0009(6) 0.0010(6) 
C11 0.0157(8) 0.0173(7) 0.0226(9) -0.0011(6) -0.0029(6) -0.0003(6) 
C17 0.0178(7) 0.0117(7) 0.0196(7) -0.0008(5) -0.0039(6) -0.0016(6) 
C8 0.0152(7) 0.0130(7) 0.0227(8) 0.0026(6) 0.0005(6) 0.0010(6) 
C7 0.0178(7) 0.0125(8) 0.0242(8) 0.0003(6) 0.0022(6) 0.0010(6) 
C9 0.0190(7) 0.0179(8) 0.0245(8) 0.0011(6) -0.0009(6) -0.0012(6) 
C15 0.0197(8) 0.0206(8) 0.0352(10) 0.0027(7) -0.0026(7) -0.0032(7) 
C3 0.0431(11) 0.0226(9) 0.0185(8) -0.0009(7) -0.0038(7) 0.0049(8) 
C6 0.0159(7) 0.0155(7) 0.0210(8) -0.0018(6) 0.0005(6) 0.0003(6) 
C2 0.0312(9) 0.0155(8) 0.0219(8) 0.0001(6) 0.0002(7) 0.0036(7) 
C10 0.0154(7) 0.0165(7) 0.0197(8) 0.0024(6) 0.0001(6) 0.0010(6) 
C5 0.0268(8) 0.0154(8) 0.0247(9) -0.0024(6) -0.0020(6) 0.0007(6) 
C12 0.0266(9) 0.0245(9) 0.0231(9) 0.0014(7) -0.0014(7) -0.0015(7) 
C16 0.0162(7) 0.0198(8) 0.0233(8) 0.0011(6) -0.0025(6) 0.0011(6) 
C13 0.0320(9) 0.0337(10) 0.0248(9) -0.0069(8) -0.0054(7) -0.0006(8) 
C14 0.0252(9) 0.0247(9) 0.0391(10) -0.0076(8) -0.0070(7) -0.0040(7) 
C4 0.0398(10) 0.0201(9) 0.0226(9) -0.0062(7) -0.0035(7) 0.0021(7) 
C18 0.0303(9) 0.0168(8) 0.0282(9) 0.0064(7) 0.0038(7) 0.0062(7) 
 
_geom_special_details 
; 
 All esds (except the esd in the dihedral angle between two l.s. planes) 
 are estimated using the full covariance matrix.  The cell esds are taken 
 into account individually in the estimation of esds in distances, angles 
 and torsion angles; correlations between esds in cell parameters are only 
 used when they are defined by crystal symmetry.  An approximate (isotropic) 
 treatment of cell esds is used for estimating esds involving l.s. planes. 
; 
 
loop_ 
 _geom_bond_atom_site_label_1 
 _geom_bond_atom_site_label_2 
 _geom_bond_distance 
 _geom_bond_site_symmetry_2 
 _geom_bond_publ_flag 
Pd1 C1 1.9741(16) . ? 
Pd1 N1 2.0378(14) . ? 
Pd1 O3 2.0455(11) . ? 
Pd1 O4 2.1268(11) . ? 
Pd1 Pd1 2.9357(8) 2 ? 
O3 C17 1.2688(19) . ? 
N1 C10 1.302(2) . ? 
N1 C8 1.404(2) . ? 
O4 C17 1.246(2) 2 ? 
O2 C9 1.192(2) . ? 
O1 C10 1.3618(19) . ? 
O1 C9 1.405(2) . ? 
C1 C2 1.393(2) . ? 
C1 C6 1.409(2) . ? 
C11 C12 1.392(3) . ? 
C11 C16 1.394(2) . ? 
C11 C10 1.452(2) . ? 
C17 O4 1.246(2) 2 ? 
C17 C18 1.505(2) . ? 
C8 C7 1.343(2) . ? 
C8 C9 1.456(2) . ? 
C7 C6 1.438(2) . ? 
C15 C16 1.384(2) . ? 
C15 C14 1.384(3) . ? 
C3 C2 1.385(2) . ? 
C3 C4 1.390(3) . ? 
C6 C5 1.404(2) . ? 
C5 C4 1.376(3) . ? 
C12 C13 1.383(3) . ? 
C13 C14 1.387(3) . ? 
 
loop_ 
 _geom_angle_atom_site_label_1 
 _geom_angle_atom_site_label_2 
 _geom_angle_atom_site_label_3 
 _geom_angle 
 _geom_angle_site_symmetry_1 
 _geom_angle_site_symmetry_3 
 _geom_angle_publ_flag 
C1 Pd1 N1 91.71(6) . . ? 
C1 Pd1 O3 90.49(6) . . ? 
N1 Pd1 O3 177.42(5) . . ? 
C1 Pd1 O4 172.16(5) . . ? 
N1 Pd1 O4 95.54(5) . . ? 
O3 Pd1 O4 82.34(5) . . ? 
C1 Pd1 Pd1 108.22(5) . 2 ? 
N1 Pd1 Pd1 93.11(4) . 2 ? 
O3 Pd1 Pd1 84.92(3) . 2 ? 
O4 Pd1 Pd1 74.43(3) . 2 ? 
C17 O3 Pd1 118.50(10) . . ? 
C10 N1 C8 106.49(13) . . ? 
C10 N1 Pd1 130.85(11) . . ? 
C8 N1 Pd1 120.13(10) . . ? 
C17 O4 Pd1 130.31(10) 2 . ? 
C10 O1 C9 107.07(12) . . ? 
C2 C1 C6 117.29(15) . . ? 
C2 C1 Pd1 118.03(12) . . ? 
C6 C1 Pd1 124.57(12) . . ? 
C12 C11 C16 120.14(16) . . ? 
C12 C11 C10 119.57(16) . . ? 
C16 C11 C10 120.15(16) . . ? 
O4 C17 O3 126.30(14) 2 . ? 
O4 C17 C18 116.76(14) 2 . ? 
O3 C17 C18 116.93(14) . . ? 
C7 C8 N1 126.80(15) . . ? 
C7 C8 C9 125.22(15) . . ? 
N1 C8 C9 107.89(14) . . ? 
C8 C7 C6 126.27(16) . . ? 
O2 C9 O1 121.75(15) . . ? 
O2 C9 C8 133.88(16) . . ? 
O1 C9 C8 104.36(13) . . ? 
C16 C15 C14 119.90(17) . . ? 
C2 C3 C4 120.63(17) . . ? 
C5 C6 C1 120.59(15) . . ? 
C5 C6 C7 116.51(15) . . ? 
C1 C6 C7 122.83(15) . . ? 
C3 C2 C1 121.70(17) . . ? 
N1 C10 O1 114.10(14) . . ? 
N1 C10 C11 130.27(15) . . ? 
O1 C10 C11 115.51(14) . . ? 
C4 C5 C6 120.73(17) . . ? 
C13 C12 C11 119.64(18) . . ? 
C15 C16 C11 119.78(17) . . ? 
C12 C13 C14 120.06(18) . . ? 
C15 C14 C13 120.46(17) . . ? 
C5 C4 C3 118.99(17) . . ? 
 
_diffrn_measured_fraction_theta_max    0.998 
_diffrn_reflns_theta_full              27.57 
_diffrn_measured_fraction_theta_full   0.998 
_refine_diff_density_max    0.636 
_refine_diff_density_min   -0.763 
_refine_diff_density_rms    0.084 


#==============================================================================

data___15

#==============================================================================

_audit_creation_method            SHELXL-97 
_chemical_name_systematic 
; 
 ? 
; 
_chemical_name_common             ? 
_chemical_melting_point           ? 
_chemical_formula_moiety          ? 
_chemical_formula_sum 
 'C20 H16 Cl N3 O6 Pd' 
_chemical_formula_weight          536.21 
 
loop_ 
 _atom_type_symbol 
 _atom_type_description 
 _atom_type_scat_dispersion_real 
 _atom_type_scat_dispersion_imag 
 _atom_type_scat_source 
 'C'  'C'   0.0033   0.0016 
 'International Tables Vol C Tables 4.2.6.8 and 6.1.1.4' 
 'H'  'H'   0.0000   0.0000 
 'International Tables Vol C Tables 4.2.6.8 and 6.1.1.4' 
 'O'  'O'   0.0106   0.0060 
 'International Tables Vol C Tables 4.2.6.8 and 6.1.1.4' 
 'N'  'N'   0.0061   0.0033 
 'International Tables Vol C Tables 4.2.6.8 and 6.1.1.4' 
 'Cl'  'Cl'   0.1484   0.1585 
 'International Tables Vol C Tables 4.2.6.8 and 6.1.1.4' 
 'Pd'  'Pd'  -0.9988   1.0072 
 'International Tables Vol C Tables 4.2.6.8 and 6.1.1.4' 
 
_symmetry_cell_setting            orthorhombic 
_symmetry_space_group_name_H-M   'P 21 21 21'
 
loop_ 
 _symmetry_equiv_pos_as_xyz 
 'x, y, z' 
 '-x+1/2, -y, z+1/2' 
 '-x, y+1/2, -z+1/2' 
 'x+1/2, -y+1/2, -z' 
 
_cell_length_a                    7.8948(3) 
_cell_length_b                    11.6296(5) 
_cell_length_c                    22.1963(9) 
_cell_angle_alpha                 90.00 
_cell_angle_beta                  90.00 
_cell_angle_gamma                 90.00 
_cell_volume                      2037.92(14) 
_cell_formula_units_Z             4 
_cell_measurement_temperature     150(2) 
_cell_measurement_reflns_used     7029 
_cell_measurement_theta_min       3.0891 
_cell_measurement_theta_max       28.4442 
 
_exptl_crystal_description        needle 
_exptl_crystal_colour             orange 
_exptl_crystal_size_max           0.63 
_exptl_crystal_size_mid           0.14 
_exptl_crystal_size_min           0.07 
_exptl_crystal_density_meas       ? 
_exptl_crystal_density_diffrn     1.748 
_exptl_crystal_density_method     'not measured' 
_exptl_crystal_F_000              1072 
_exptl_absorpt_coefficient_mu     1.086 
_exptl_absorpt_correction_type    'multi-scan' 
_exptl_absorpt_correction_T_min   0.9222 
_exptl_absorpt_correction_T_max   1.0722 
_exptl_absorpt_process_details    ? 
 
_exptl_special_details 
;
CrysAlis RED, Oxford Diffraction Ltd.,
Version 1.171.32.19 (release 28-02-2008 CrysAlis171 .NET)
(compiled Feb 28 2008,12:10:31)
Empirical absorption correction using spherical harmonics,
 implemented in SCALE3 ABSPACK scaling algorithm.
; 
_diffrn_ambient_temperature       150(2) 
_diffrn_radiation_wavelength      0.71073 
_diffrn_radiation_type            MoK\a 
_diffrn_radiation_source          'Enhance (Mo) X-ray Source' 
_diffrn_radiation_monochromator   graphite 
_diffrn_measurement_device_type   ? 
_diffrn_measurement_method        ? 
_diffrn_detector_area_resol_mean  ? 
_diffrn_standards_number          ? 
_diffrn_standards_interval_count  ? 
_diffrn_standards_interval_time   ? 
_diffrn_standards_decay_%         ? 
_diffrn_reflns_number             10095 
_diffrn_reflns_av_R_equivalents   0.0236 
_diffrn_reflns_av_sigmaI/netI     0.0382 
_diffrn_reflns_limit_h_min        -5 
_diffrn_reflns_limit_h_max        9 
_diffrn_reflns_limit_k_min        -15 
_diffrn_reflns_limit_k_max        14 
_diffrn_reflns_limit_l_min        -27 
_diffrn_reflns_limit_l_max        27 
_diffrn_reflns_theta_min          2.74 
_diffrn_reflns_theta_max          28.83 
_reflns_number_total              4566 
_reflns_number_gt                 4087 
_reflns_threshold_expression      >2sigma(I) 
 
_computing_data_collection        ? 
_computing_cell_refinement        ? 
_computing_data_reduction         ? 
_computing_structure_solution     'SHELXS-97 (Sheldrick, 1990)' 
_computing_structure_refinement   'SHELXL-97 (Sheldrick, 1997)' 
_computing_molecular_graphics     ? 
_computing_publication_material   ? 
 
_refine_special_details 
; 
 Refinement of F^2^ against ALL reflections.  The weighted R-factor wR and 
 goodness of fit S are based on F^2^, conventional R-factors R are based 
 on F, with F set to zero for negative F^2^. The threshold expression of 
 F^2^ > 2sigma(F^2^) is used only for calculating R-factors(gt) etc. and is 
 not relevant to the choice of reflections for refinement.  R-factors based 
 on F^2^ are statistically about twice as large as those based on F, and R- 
 factors based on ALL data will be even larger. 
; 
 
_refine_ls_structure_factor_coef  Fsqd  
_refine_ls_matrix_type            full 
_refine_ls_weighting_scheme       calc  
_refine_ls_weighting_details 
 'calc w=1/[\s^2^(Fo^2^)+(0.0241P)^2^+0.0000P] where P=(Fo^2^+2Fc^2^)/3' 
_atom_sites_solution_primary      direct 
_atom_sites_solution_secondary    difmap 
_atom_sites_solution_hydrogens    geom 
_refine_ls_hydrogen_treatment     constr 
_refine_ls_extinction_method      none 
_refine_ls_extinction_coef        ? 
_refine_ls_abs_structure_details 
 'Flack H D (1983), Acta Cryst. A39, 876-881' 
_refine_ls_abs_structure_Flack    -0.020(19) 
_refine_ls_number_reflns          4566 
_refine_ls_number_parameters      282 
_refine_ls_number_restraints      0 
_refine_ls_R_factor_all           0.0291 
_refine_ls_R_factor_gt            0.0233 
_refine_ls_wR_factor_ref          0.0464 
_refine_ls_wR_factor_gt           0.0453 
_refine_ls_goodness_of_fit_ref    0.966 
_refine_ls_restrained_S_all       0.966 
_refine_ls_shift/su_max           0.015 
_refine_ls_shift/su_mean          0.001 
 
loop_ 
 _atom_site_label 
 _atom_site_type_symbol 
 _atom_site_fract_x 
 _atom_site_fract_y 
 _atom_site_fract_z 
 _atom_site_U_iso_or_equiv 
 _atom_site_adp_type 
 _atom_site_occupancy 
 _atom_site_symmetry_multiplicity 
 _atom_site_calc_flag 
 _atom_site_refinement_flags 
 _atom_site_disorder_assembly 
 _atom_site_disorder_group 
Pd1 Pd -0.93245(2) -0.112149(16) -0.065204(8) 0.01720(5) Uani 1 1 d . . . 
C1 C -0.9956(3) -0.1359(2) 0.02072(12) 0.0198(6) Uani 1 1 d . . . 
C2 C -1.0347(3) -0.0424(2) 0.05691(13) 0.0253(6) Uani 1 1 d . . . 
H2A H -1.0455 0.0315 0.0391 0.030 Uiso 1 1 calc R . . 
C3 C -1.0582(4) -0.0542(3) 0.11832(12) 0.0309(6) Uani 1 1 d . . . 
H3A H -1.0855 0.0115 0.1418 0.037 Uiso 1 1 calc R . . 
C4 C -1.0424(4) -0.1599(3) 0.14594(12) 0.0309(7) Uani 1 1 d . . . 
H4A H -1.0548 -0.1670 0.1884 0.037 Uiso 1 1 calc R . . 
C5 C -1.0087(3) -0.2543(3) 0.11116(13) 0.0261(7) Uani 1 1 d . . . 
H5A H -1.0001 -0.3277 0.1297 0.031 Uiso 1 1 calc R . . 
C6 C -0.9866(3) -0.2449(2) 0.04851(11) 0.0184(6) Uani 1 1 d . . . 
C7 C -0.9704(3) -0.3514(2) 0.01573(11) 0.0208(6) Uani 1 1 d . . . 
H7A H -0.9469 -0.4190 0.0383 0.025 Uiso 1 1 calc R . . 
C8 C -0.9861(3) -0.3623(2) -0.04396(11) 0.0202(6) Uani 1 1 d . . . 
C9 C -0.9987(3) -0.4713(2) -0.07620(13) 0.0251(6) Uani 1 1 d . . . 
O1 O -0.9846(2) -0.56942(15) -0.06274(10) 0.0341(5) Uani 1 1 d . . . 
O2 O -1.0396(2) -0.43827(15) -0.13581(8) 0.0248(4) Uani 1 1 d . . . 
N1 N -1.0112(3) -0.27332(19) -0.08522(9) 0.0178(5) Uani 1 1 d . . . 
C10 C -1.0456(3) -0.3213(2) -0.13693(11) 0.0187(6) Uani 1 1 d . . . 
C11 C -1.0887(3) -0.2704(2) -0.19460(11) 0.0193(5) Uani 1 1 d . . . 
C12 C -1.1706(3) -0.1641(2) -0.19733(12) 0.0195(5) Uani 1 1 d . . . 
H12A H -1.1977 -0.1238 -0.1614 0.023 Uiso 1 1 calc R . . 
C13 C -1.2120(3) -0.1181(3) -0.25263(12) 0.0267(6) Uani 1 1 d . . . 
H13A H -1.2689 -0.0462 -0.2548 0.032 Uiso 1 1 calc R . . 
C14 C -1.1704(4) -0.1766(3) -0.30530(13) 0.0302(7) Uani 1 1 d . . . 
H14A H -1.1981 -0.1442 -0.3433 0.036 Uiso 1 1 calc R . . 
C15 C -1.0889(4) -0.2819(2) -0.30242(13) 0.0308(7) Uani 1 1 d . . . 
H15A H -1.0604 -0.3216 -0.3384 0.037 Uiso 1 1 calc R . . 
C16 C -1.0492(3) -0.3288(2) -0.24734(11) 0.0236(6) Uani 1 1 d . . . 
H16A H -0.9944 -0.4014 -0.2454 0.028 Uiso 1 1 calc R . . 
N2 N -0.8367(3) 0.0414(2) -0.04311(9) 0.0237(5) Uani 1 1 d . . . 
C17 C -0.7759(3) 0.1274(2) -0.03225(11) 0.0214(6) Uani 1 1 d . . . 
C18 C -0.7020(4) 0.2377(2) -0.01788(13) 0.0273(6) Uani 1 1 d . . . 
H17A H -0.5980 0.2484 -0.0414 0.033 Uiso 1 1 calc R . . 
H17B H -0.6751 0.2407 0.0252 0.033 Uiso 1 1 calc R . . 
H17C H -0.7827 0.2989 -0.0278 0.033 Uiso 1 1 calc R . . 
N3 N -0.8363(3) -0.08551(19) -0.15327(10) 0.0214(5) Uani 1 1 d . . . 
C19 C -0.7684(3) -0.0754(2) -0.19740(13) 0.0209(6) Uani 1 1 d . . . 
C20 C -0.6794(4) -0.0648(3) -0.25498(13) 0.0338(7) Uani 1 1 d . . . 
H20A H -0.6069 -0.1322 -0.2611 0.041 Uiso 1 1 calc R . . 
H20B H -0.6096 0.0049 -0.2546 0.041 Uiso 1 1 calc R . . 
H20C H -0.7622 -0.0599 -0.2878 0.041 Uiso 1 1 calc R . . 
Cl1 Cl -0.36918(8) -0.85916(6) -0.14216(3) 0.02534(16) Uani 1 1 d . . . 
O3 O -0.3529(3) -0.8564(2) -0.20637(9) 0.0445(6) Uani 1 1 d . . . 
O4 O -0.5110(3) -0.9280(2) -0.12555(11) 0.0476(6) Uani 1 1 d . . . 
O5 O -0.2199(3) -0.9071(2) -0.11616(10) 0.0493(6) Uani 1 1 d . . . 
O6 O -0.3923(3) -0.74415(18) -0.12038(10) 0.0405(6) Uani 1 1 d . . . 
 
loop_ 
 _atom_site_aniso_label 
 _atom_site_aniso_U_11 
 _atom_site_aniso_U_22 
 _atom_site_aniso_U_33 
 _atom_site_aniso_U_23 
 _atom_site_aniso_U_13 
 _atom_site_aniso_U_12 
Pd1 0.02078(9) 0.01473(8) 0.01608(8) 0.00100(8) 0.00127(8) -0.00087(9) 
C1 0.0145(11) 0.0244(16) 0.0204(13) 0.0005(11) -0.0001(9) -0.0002(11) 
C2 0.0259(15) 0.0200(13) 0.0300(17) -0.0003(12) 0.0022(11) 0.0047(11) 
C3 0.0326(16) 0.0356(17) 0.0244(15) -0.0089(13) 0.0058(14) 0.0041(16) 
C4 0.0332(18) 0.0413(17) 0.0182(14) -0.0020(13) 0.0042(12) -0.0012(14) 
C5 0.0234(14) 0.0331(18) 0.0217(15) 0.0054(13) -0.0012(10) -0.0070(12) 
C6 0.0158(13) 0.0207(14) 0.0187(14) 0.0010(10) 0.0005(9) -0.0005(10) 
C7 0.0221(16) 0.0193(14) 0.0209(14) 0.0038(11) -0.0003(10) -0.0016(11) 
C8 0.0208(13) 0.0182(15) 0.0215(13) 0.0006(10) 0.0019(9) -0.0005(10) 
C9 0.0301(14) 0.0215(15) 0.0237(17) 0.0021(12) 0.0034(11) 0.0010(11) 
O1 0.0576(13) 0.0142(9) 0.0304(11) 0.0033(10) 0.0028(10) 0.0007(8) 
O2 0.0391(13) 0.0139(9) 0.0213(10) -0.0005(8) -0.0011(9) 0.0004(9) 
N1 0.0212(11) 0.0183(12) 0.0138(11) 0.0023(9) 0.0008(7) -0.0004(9) 
C10 0.0188(15) 0.0152(13) 0.0219(14) -0.0001(10) -0.0006(11) -0.0002(11) 
C11 0.0193(14) 0.0193(13) 0.0193(13) 0.0001(10) -0.0004(10) -0.0026(11) 
C12 0.0157(13) 0.0196(14) 0.0233(14) -0.0032(12) -0.0006(10) -0.0009(11) 
C13 0.0211(13) 0.0288(15) 0.0303(15) 0.0033(15) -0.0036(10) -0.0003(15) 
C14 0.0339(17) 0.0352(18) 0.0217(15) 0.0037(13) -0.0034(12) -0.0012(14) 
C15 0.0393(18) 0.0326(16) 0.0204(14) -0.0024(12) 0.0018(12) 0.0049(15) 
C16 0.0285(16) 0.0196(14) 0.0226(14) -0.0007(10) 0.0012(12) 0.0021(12) 
N2 0.0296(13) 0.0220(13) 0.0195(12) 0.0012(10) 0.0034(9) -0.0025(11) 
C17 0.0236(14) 0.0226(17) 0.0180(14) 0.0015(12) 0.0037(9) 0.0032(12) 
C18 0.0308(16) 0.0168(14) 0.0341(17) -0.0037(13) 0.0030(12) -0.0023(13) 
N3 0.0208(12) 0.0213(13) 0.0221(13) 0.0019(9) 0.0002(9) -0.0024(9) 
C19 0.0177(14) 0.0192(14) 0.0258(16) 0.0036(11) -0.0040(11) -0.0013(11) 
C20 0.0342(17) 0.0420(19) 0.0253(17) 0.0049(14) 0.0081(13) 0.0029(15) 
Cl1 0.0296(4) 0.0251(4) 0.0213(3) -0.0020(3) 0.0031(2) -0.0029(3) 
O3 0.0684(15) 0.0473(15) 0.0178(11) -0.0049(10) 0.0053(9) -0.0031(12) 
O4 0.0432(13) 0.0457(15) 0.0539(16) 0.0017(12) 0.0087(10) -0.0211(11) 
O5 0.0423(13) 0.0545(17) 0.0511(15) 0.0011(13) -0.0115(10) 0.0117(13) 
O6 0.0609(16) 0.0240(11) 0.0366(13) -0.0061(10) 0.0052(10) 0.0004(11) 
 
_geom_special_details 
; 
 All esds (except the esd in the dihedral angle between two l.s. planes) 
 are estimated using the full covariance matrix.  The cell esds are taken 
 into account individually in the estimation of esds in distances, angles 
 and torsion angles; correlations between esds in cell parameters are only 
 used when they are defined by crystal symmetry.  An approximate (isotropic) 
 treatment of cell esds is used for estimating esds involving l.s. planes. 
; 
 
loop_ 
 _geom_bond_atom_site_label_1 
 _geom_bond_atom_site_label_2 
 _geom_bond_distance 
 _geom_bond_site_symmetry_2 
 _geom_bond_publ_flag 
Pd1 C1 1.991(3) . ? 
Pd1 N2 2.000(2) . ? 
Pd1 N1 2.024(2) . ? 
Pd1 N3 2.120(2) . ? 
C1 C2 1.386(4) . ? 
C1 C6 1.412(4) . ? 
C2 C3 1.383(4) . ? 
C3 C4 1.379(4) . ? 
C4 C5 1.368(4) . ? 
C5 C6 1.406(4) . ? 
C6 C7 1.442(4) . ? 
C7 C8 1.337(3) . ? 
C8 N1 1.396(3) . ? 
C8 C9 1.459(4) . ? 
C9 O1 1.185(3) . ? 
C9 O2 1.415(3) . ? 
O2 C10 1.361(3) . ? 
N1 C10 1.305(3) . ? 
C10 C11 1.451(3) . ? 
C11 C16 1.389(3) . ? 
C11 C12 1.397(4) . ? 
C12 C13 1.378(4) . ? 
C13 C14 1.392(4) . ? 
C14 C15 1.385(4) . ? 
C15 C16 1.375(4) . ? 
N2 C17 1.135(3) . ? 
C17 C18 1.446(4) . ? 
N3 C19 1.123(3) . ? 
C19 C20 1.464(4) . ? 
Cl1 O4 1.425(2) . ? 
Cl1 O5 1.426(2) . ? 
Cl1 O3 1.431(2) . ? 
Cl1 O6 1.434(2) . ? 
 
loop_ 
 _geom_angle_atom_site_label_1 
 _geom_angle_atom_site_label_2 
 _geom_angle_atom_site_label_3 
 _geom_angle 
 _geom_angle_site_symmetry_1 
 _geom_angle_site_symmetry_3 
 _geom_angle_publ_flag 
C1 Pd1 N2 89.06(10) . . ? 
C1 Pd1 N1 90.27(10) . . ? 
N2 Pd1 N1 175.30(9) . . ? 
C1 Pd1 N3 173.48(9) . . ? 
N2 Pd1 N3 87.72(9) . . ? 
N1 Pd1 N3 92.46(8) . . ? 
C2 C1 C6 117.5(2) . . ? 
C2 C1 Pd1 120.1(2) . . ? 
C6 C1 Pd1 122.05(19) . . ? 
C3 C2 C1 121.6(3) . . ? 
C4 C3 C2 121.0(3) . . ? 
C5 C4 C3 118.8(3) . . ? 
C4 C5 C6 121.3(3) . . ? 
C5 C6 C1 119.7(3) . . ? 
C5 C6 C7 116.3(2) . . ? 
C1 C6 C7 123.7(2) . . ? 
C8 C7 C6 125.0(2) . . ? 
C7 C8 N1 126.3(2) . . ? 
C7 C8 C9 125.1(2) . . ? 
N1 C8 C9 108.2(2) . . ? 
O1 C9 O2 121.2(3) . . ? 
O1 C9 C8 135.0(3) . . ? 
O2 C9 C8 103.8(2) . . ? 
C10 O2 C9 107.2(2) . . ? 
C10 N1 C8 106.8(2) . . ? 
C10 N1 Pd1 130.78(18) . . ? 
C8 N1 Pd1 119.93(16) . . ? 
N1 C10 O2 113.8(2) . . ? 
N1 C10 C11 130.6(2) . . ? 
O2 C10 C11 115.6(2) . . ? 
C16 C11 C12 120.0(2) . . ? 
C16 C11 C10 119.4(2) . . ? 
C12 C11 C10 120.5(2) . . ? 
C13 C12 C11 119.5(3) . . ? 
C12 C13 C14 120.1(3) . . ? 
C15 C14 C13 120.2(3) . . ? 
C16 C15 C14 119.9(3) . . ? 
C15 C16 C11 120.3(3) . . ? 
C17 N2 Pd1 176.7(2) . . ? 
N2 C17 C18 178.7(3) . . ? 
C19 N3 Pd1 172.2(2) . . ? 
N3 C19 C20 178.9(3) . . ? 
O4 Cl1 O5 108.95(15) . . ? 
O4 Cl1 O3 109.91(14) . . ? 
O5 Cl1 O3 109.74(14) . . ? 
O4 Cl1 O6 109.68(14) . . ? 
O5 Cl1 O6 109.49(14) . . ? 
O3 Cl1 O6 109.06(13) . . ? 
 
_diffrn_measured_fraction_theta_max    0.884 
_diffrn_reflns_theta_full              28.83 
_diffrn_measured_fraction_theta_full   0.884 
_refine_diff_density_max    0.479 
_refine_diff_density_min   -0.329 
_refine_diff_density_rms    0.067 

#==============================================================================

data___17

#==============================================================================

_audit_creation_method            SHELXL-97 
_chemical_name_systematic 
; 
 ? 
; 
_chemical_name_common             ? 
_chemical_melting_point           ? 
_chemical_formula_moiety          ? 
_chemical_formula_sum 
 'C26 H20 I0.50 N0.50 O P Pd0.50' 
_chemical_formula_weight          503.05 
 
loop_ 
 _atom_type_symbol 
 _atom_type_description 
 _atom_type_scat_dispersion_real 
 _atom_type_scat_dispersion_imag 
 _atom_type_scat_source 
 'C'  'C'   0.0033   0.0016 
 'International Tables Vol C Tables 4.2.6.8 and 6.1.1.4' 
 'H'  'H'   0.0000   0.0000 
 'International Tables Vol C Tables 4.2.6.8 and 6.1.1.4' 
 'I'  'I'  -0.4742   1.8119 
 'International Tables Vol C Tables 4.2.6.8 and 6.1.1.4' 
 'O'  'O'   0.0106   0.0060 
 'International Tables Vol C Tables 4.2.6.8 and 6.1.1.4' 
 'P'  'P'   0.1023   0.0942 
 'International Tables Vol C Tables 4.2.6.8 and 6.1.1.4' 
 'Pd'  'Pd'  -0.9988   1.0072 
 'International Tables Vol C Tables 4.2.6.8 and 6.1.1.4' 
 'N'  'N'   0.0061   0.0033 
 'International Tables Vol C Tables 4.2.6.8 and 6.1.1.4' 
 
_symmetry_cell_setting            monoclinic 
_symmetry_space_group_name_H-M    'P 1 21/n 1' 
 
loop_ 
 _symmetry_equiv_pos_as_xyz 
 'x, y, z' 
 '-x+1/2, y+1/2, -z+1/2' 
 '-x, -y, -z' 
 'x-1/2, -y-1/2, z-1/2' 
 
_cell_length_a                    10.7843(2) 
_cell_length_b                    32.5694(6) 
_cell_length_c                    12.1887(2) 
_cell_angle_alpha                 90.00 
_cell_angle_beta                  95.104(2) 
_cell_angle_gamma                 90.00 
_cell_volume                      4264.16(13) 
_cell_formula_units_Z             8 
_cell_measurement_temperature     150(2) 
_cell_measurement_reflns_used     9500 
_cell_measurement_theta_min       3.0104 
_cell_measurement_theta_max       24.2863 
 
_exptl_crystal_description        block 
_exptl_crystal_colour             yellow 
_exptl_crystal_size_max           0.13 
_exptl_crystal_size_mid           0.09 
_exptl_crystal_size_min           0.06 
_exptl_crystal_density_meas       ? 
_exptl_crystal_density_diffrn     1.567 
_exptl_crystal_density_method     'not measured' 
_exptl_crystal_F_000              2016 
_exptl_absorpt_coefficient_mu     1.277 
_exptl_absorpt_correction_type    'multi-scan' 
_exptl_absorpt_correction_T_min   0.8515 
_exptl_absorpt_correction_T_max   0.9273 
_exptl_absorpt_process_details    ? 
_exptl_special_details 
; 
 ? 
; 
 
_diffrn_ambient_temperature       150(2) 
_diffrn_radiation_wavelength      0.71073 
_diffrn_radiation_type            MoK\a 
_diffrn_radiation_source          'Enhance (Mo) X-ray Source'
_diffrn_radiation_monochromator   graphite 
_diffrn_measurement_device_type   ? 
_diffrn_measurement_method        ? 
_diffrn_detector_area_resol_mean  16.3990 
_diffrn_standards_number          ? 
_diffrn_standards_interval_count  ? 
_diffrn_standards_interval_time   ? 
_diffrn_standards_decay_%         ? 
_diffrn_reflns_number             68817 
_diffrn_reflns_av_R_equivalents   0.1343 
_diffrn_reflns_av_sigmaI/netI     0.0806 
_diffrn_reflns_limit_h_min        -12 
_diffrn_reflns_limit_h_max        12 
_diffrn_reflns_limit_k_min        -38 
_diffrn_reflns_limit_k_max        38 
_diffrn_reflns_limit_l_min        -14 
_diffrn_reflns_limit_l_max        14 
_diffrn_reflns_theta_min          2.64 
_diffrn_reflns_theta_max          25.00 
_reflns_number_total              7513 
_reflns_number_gt                 5203 
_reflns_threshold_expression      >2sigma(I) 
 
_computing_data_collection        ? 
_computing_cell_refinement        ? 
_computing_data_reduction         ? 
_computing_structure_solution     'SHELXS-97 (Sheldrick, 1990)' 
_computing_structure_refinement   'SHELXL-97 (Sheldrick, 1997)' 
_computing_molecular_graphics     ? 
_computing_publication_material   ? 
 
_refine_special_details 
; 
 Refinement of F^2^ against ALL reflections.  The weighted R-factor wR and 
 goodness of fit S are based on F^2^, conventional R-factors R are based 
 on F, with F set to zero for negative F^2^. The threshold expression of 
 F^2^ > 2sigma(F^2^) is used only for calculating R-factors(gt) etc. and is 
 not relevant to the choice of reflections for refinement.  R-factors based 
 on F^2^ are statistically about twice as large as those based on F, and R- 
 factors based on ALL data will be even larger. 
; 
 
_refine_ls_structure_factor_coef  Fsqd  
_refine_ls_matrix_type            full 
_refine_ls_weighting_scheme       calc  
_refine_ls_weighting_details 
 'calc w=1/[\s^2^(Fo^2^)+(0.0344P)^2^+0.0000P] where P=(Fo^2^+2Fc^2^)/3' 
_atom_sites_solution_primary      direct 
_atom_sites_solution_secondary    difmap 
_atom_sites_solution_hydrogens    geom 
_refine_ls_hydrogen_treatment     constr 
_refine_ls_extinction_method      none 
_refine_ls_extinction_coef        ? 
_refine_ls_number_reflns          7513 
_refine_ls_number_parameters      532 
_refine_ls_number_restraints      0 
_refine_ls_R_factor_all           0.0822 
_refine_ls_R_factor_gt            0.0449 
_refine_ls_wR_factor_ref          0.0821 
_refine_ls_wR_factor_gt           0.0751 
_refine_ls_goodness_of_fit_ref    1.011 
_refine_ls_restrained_S_all       1.011 
_refine_ls_shift/su_max           0.001 
_refine_ls_shift/su_mean          0.000 
 
loop_ 
 _atom_site_label 
 _atom_site_type_symbol 
 _atom_site_fract_x 
 _atom_site_fract_y 
 _atom_site_fract_z 
 _atom_site_U_iso_or_equiv 
 _atom_site_adp_type 
 _atom_site_occupancy 
 _atom_site_symmetry_multiplicity 
 _atom_site_calc_flag 
 _atom_site_refinement_flags 
 _atom_site_disorder_assembly 
 _atom_site_disorder_group 
Pd1 Pd 1.14571(3) 0.145269(11) 0.23853(3) 0.01230(10) Uani 1 1 d . . . 
I1 I 0.90438(3) 0.164345(10) 0.22897(3) 0.02150(10) Uani 1 1 d . . . 
P1 P 1.14821(12) 0.13273(4) 0.42697(10) 0.0144(3) Uani 1 1 d . . . 
P2 P 1.17150(11) 0.16944(4) 0.06130(10) 0.0135(3) Uani 1 1 d . . . 
N1 N 1.1866(4) 0.05741(11) 0.1984(3) 0.0143(9) Uani 1 1 d . . . 
O1 O 1.3067(3) -0.04266(11) 0.2069(3) 0.0278(9) Uani 1 1 d . . . 
O2 O 1.3694(3) 0.02320(10) 0.2280(3) 0.0181(8) Uani 1 1 d . . . 
C1 C 1.3287(4) 0.13523(14) 0.2593(4) 0.0148(11) Uani 1 1 d . . . 
C2 C 1.4086(4) 0.16781(15) 0.2879(4) 0.0168(11) Uani 1 1 d . . . 
H2A H 1.3750 0.1946 0.2934 0.020 Uiso 1 1 calc R . . 
C3 C 1.5368(5) 0.16221(17) 0.3086(4) 0.0246(13) Uani 1 1 d . . . 
H3A H 1.5891 0.1849 0.3293 0.029 Uiso 1 1 calc R . . 
C4 C 1.5870(4) 0.12369(17) 0.2990(4) 0.0233(13) Uani 1 1 d . . . 
H4A H 1.6744 0.1198 0.3120 0.028 Uiso 1 1 calc R . . 
C5 C 1.5116(4) 0.09103(16) 0.2707(4) 0.0200(12) Uani 1 1 d . . . 
H5A H 1.5469 0.0645 0.2645 0.024 Uiso 1 1 calc R . . 
C6 C 1.3821(4) 0.09622(15) 0.2507(4) 0.0141(11) Uani 1 1 d . . . 
C7 C 1.3055(4) 0.06026(14) 0.2240(4) 0.0146(11) Uani 1 1 d . . . 
C8 C 1.2806(5) -0.00676(16) 0.2056(4) 0.0193(12) Uani 1 1 d . . . 
C9 C 1.1627(5) 0.01516(15) 0.1850(4) 0.0187(12) Uani 1 1 d . . . 
C10 C 1.0562(5) -0.00543(15) 0.1591(4) 0.0205(12) Uani 1 1 d . . . 
H10A H 1.0665 -0.0344 0.1573 0.025 Uiso 1 1 calc R . . 
C11 C 0.9285(4) 0.00784(15) 0.1333(4) 0.0184(12) Uani 1 1 d . . . 
C12 C 0.8910(5) 0.04856(15) 0.1331(4) 0.0198(12) Uani 1 1 d . . . 
H12A H 0.9504 0.0695 0.1519 0.024 Uiso 1 1 calc R . . 
C13 C 0.7679(5) 0.05882(16) 0.1057(4) 0.0242(13) Uani 1 1 d . . . 
H13A H 0.7434 0.0868 0.1064 0.029 Uiso 1 1 calc R . . 
C14 C 0.6810(5) 0.02938(17) 0.0775(4) 0.0273(13) Uani 1 1 d . . . 
H14A H 0.5967 0.0368 0.0581 0.033 Uiso 1 1 calc R . . 
C15 C 0.7164(5) -0.01107(18) 0.0775(5) 0.0348(15) Uani 1 1 d . . . 
H15A H 0.6563 -0.0318 0.0581 0.042 Uiso 1 1 calc R . . 
C16 C 0.8386(5) -0.02186(16) 0.1056(4) 0.0288(13) Uani 1 1 d . . . 
H16A H 0.8617 -0.0500 0.1059 0.035 Uiso 1 1 calc R . . 
C17 C 1.1588(4) 0.18125(15) 0.4999(4) 0.0183(12) Uani 1 1 d . . . 
C18 C 1.1384(5) 0.21722(16) 0.4420(5) 0.0269(13) Uani 1 1 d . . . 
H18A H 1.1203 0.2163 0.3643 0.032 Uiso 1 1 calc R . . 
C19 C 1.1439(5) 0.25491(18) 0.4958(5) 0.0381(16) Uani 1 1 d . . . 
H19A H 1.1290 0.2795 0.4547 0.046 Uiso 1 1 calc R . . 
C20 C 1.1704(6) 0.25686(19) 0.6068(6) 0.0428(17) Uani 1 1 d . . . 
H20A H 1.1733 0.2827 0.6432 0.051 Uiso 1 1 calc R . . 
C21 C 1.1928(5) 0.2215(2) 0.6657(5) 0.0404(17) Uani 1 1 d . . . 
H21A H 1.2119 0.2230 0.7432 0.048 Uiso 1 1 calc R . . 
C22 C 1.1881(5) 0.18359(17) 0.6137(4) 0.0279(13) Uani 1 1 d . . . 
H22A H 1.2048 0.1593 0.6554 0.033 Uiso 1 1 calc R . . 
C23 C 1.2770(4) 0.10247(15) 0.4933(4) 0.0149(11) Uani 1 1 d . . . 
C24 C 1.3911(5) 0.12061(16) 0.5242(4) 0.0199(12) Uani 1 1 d . . . 
H24A H 1.4009 0.1494 0.5150 0.024 Uiso 1 1 calc R . . 
C25 C 1.4905(5) 0.09742(17) 0.5683(4) 0.0244(13) Uani 1 1 d . . . 
H25A H 1.5685 0.1102 0.5880 0.029 Uiso 1 1 calc R . . 
C26 C 1.4770(5) 0.05580(17) 0.5838(4) 0.0273(13) Uani 1 1 d . . . 
H26A H 1.5450 0.0399 0.6151 0.033 Uiso 1 1 calc R . . 
C27 C 1.3656(5) 0.03775(17) 0.5540(4) 0.0282(14) Uani 1 1 d . . . 
H27A H 1.3563 0.0090 0.5644 0.034 Uiso 1 1 calc R . . 
C28 C 1.2654(5) 0.06038(15) 0.5087(4) 0.0229(13) Uani 1 1 d . . . 
H28A H 1.1883 0.0471 0.4881 0.027 Uiso 1 1 calc R . . 
C29 C 1.0145(4) 0.10453(14) 0.4711(4) 0.0156(11) Uani 1 1 d . . . 
C30 C 0.9645(5) 0.11144(15) 0.5703(4) 0.0207(12) Uani 1 1 d . . . 
H30A H 0.9931 0.1337 0.6162 0.025 Uiso 1 1 calc R . . 
C31 C 0.8724(5) 0.08555(16) 0.6016(4) 0.0242(13) Uani 1 1 d . . . 
H31A H 0.8367 0.0905 0.6689 0.029 Uiso 1 1 calc R . . 
C32 C 0.8318(5) 0.05279(16) 0.5370(4) 0.0250(13) Uani 1 1 d . . . 
H32A H 0.7700 0.0348 0.5604 0.030 Uiso 1 1 calc R . . 
C33 C 0.8808(5) 0.04619(16) 0.4385(4) 0.0279(13) Uani 1 1 d . . . 
H33A H 0.8524 0.0238 0.3931 0.034 Uiso 1 1 calc R . . 
C34 C 0.9718(4) 0.07232(15) 0.4050(4) 0.0202(12) Uani 1 1 d . . . 
H34A H 1.0049 0.0680 0.3363 0.024 Uiso 1 1 calc R . . 
C35 C 1.2922(4) 0.14810(14) -0.0188(4) 0.0158(11) Uani 1 1 d . . . 
C36 C 1.4171(5) 0.15056(15) 0.0196(4) 0.0218(12) Uani 1 1 d . . . 
H36A H 1.4402 0.1644 0.0869 0.026 Uiso 1 1 calc R . . 
C37 C 1.5085(5) 0.13320(16) -0.0383(4) 0.0260(13) Uani 1 1 d . . . 
H37A H 1.5936 0.1354 -0.0111 0.031 Uiso 1 1 calc R . . 
C38 C 1.4762(5) 0.11280(16) -0.1350(4) 0.0272(13) Uani 1 1 d . . . 
H38A H 1.5387 0.1007 -0.1748 0.033 Uiso 1 1 calc R . . 
C39 C 1.3533(5) 0.11000(15) -0.1741(4) 0.0275(13) Uani 1 1 d . . . 
H39A H 1.3308 0.0958 -0.2410 0.033 Uiso 1 1 calc R . . 
C40 C 1.2621(5) 0.12753(15) -0.1172(4) 0.0224(12) Uani 1 1 d . . . 
H40A H 1.1774 0.1255 -0.1458 0.027 Uiso 1 1 calc R . . 
C41 C 1.0322(4) 0.16610(15) -0.0343(4) 0.0139(11) Uani 1 1 d . . . 
C42 C 0.9905(5) 0.19821(15) -0.1023(4) 0.0223(12) Uani 1 1 d . . . 
H42A H 1.0356 0.2233 -0.1010 0.027 Uiso 1 1 calc R . . 
C43 C 0.8828(5) 0.19362(16) -0.1722(4) 0.0277(14) Uani 1 1 d . . . 
H43A H 0.8544 0.2156 -0.2192 0.033 Uiso 1 1 calc R . . 
C44 C 0.8162(5) 0.15706(16) -0.1741(4) 0.0239(13) Uani 1 1 d . . . 
H44A H 0.7414 0.1543 -0.2209 0.029 Uiso 1 1 calc R . . 
C45 C 0.8585(5) 0.12507(16) -0.1085(4) 0.0234(13) Uani 1 1 d . . . 
H45A H 0.8138 0.0999 -0.1105 0.028 Uiso 1 1 calc R . . 
C46 C 0.9660(5) 0.12943(15) -0.0393(4) 0.0205(12) Uani 1 1 d . . . 
H46A H 0.9953 0.1070 0.0057 0.025 Uiso 1 1 calc R . . 
C47 C 1.2023(4) 0.22452(14) 0.0644(4) 0.0162(11) Uani 1 1 d . . . 
C48 C 1.1189(5) 0.24923(15) 0.1170(4) 0.0204(12) Uani 1 1 d . . . 
H48A H 1.0568 0.2368 0.1565 0.025 Uiso 1 1 calc R . . 
C49 C 1.1265(5) 0.29124(15) 0.1117(4) 0.0234(13) Uani 1 1 d . . . 
H49A H 1.0682 0.3078 0.1454 0.028 Uiso 1 1 calc R . . 
C50 C 1.2188(5) 0.30915(16) 0.0575(4) 0.0242(13) Uani 1 1 d . . . 
H50A H 1.2248 0.3382 0.0547 0.029 Uiso 1 1 calc R . . 
C51 C 1.3018(5) 0.28556(16) 0.0076(4) 0.0249(13) Uani 1 1 d . . . 
H51A H 1.3654 0.2983 -0.0294 0.030 Uiso 1 1 calc R . . 
C52 C 1.2938(5) 0.24336(15) 0.0105(4) 0.0202(12) Uani 1 1 d . . . 
H52A H 1.3518 0.2272 -0.0248 0.024 Uiso 1 1 calc R . . 
 
loop_ 
 _atom_site_aniso_label 
 _atom_site_aniso_U_11 
 _atom_site_aniso_U_22 
 _atom_site_aniso_U_33 
 _atom_site_aniso_U_23 
 _atom_site_aniso_U_13 
 _atom_site_aniso_U_12 
Pd1 0.0102(2) 0.0144(2) 0.0126(2) 0.00038(17) 0.00279(14) -0.00022(17) 
I1 0.01462(18) 0.0258(2) 0.02475(19) 0.00091(16) 0.00518(14) 0.00204(16) 
P1 0.0130(7) 0.0160(7) 0.0144(7) -0.0005(5) 0.0029(5) -0.0002(6) 
P2 0.0122(6) 0.0159(7) 0.0128(6) 0.0005(6) 0.0027(5) 0.0016(6) 
N1 0.015(2) 0.013(2) 0.015(2) -0.0017(18) 0.0015(18) -0.0021(18) 
O1 0.022(2) 0.019(2) 0.041(2) -0.0051(18) -0.0047(17) 0.0044(17) 
O2 0.0132(19) 0.0150(19) 0.025(2) -0.0030(15) -0.0045(15) 0.0044(15) 
C1 0.013(3) 0.022(3) 0.010(2) 0.004(2) -0.002(2) -0.005(2) 
C2 0.018(3) 0.017(3) 0.015(3) 0.007(2) 0.002(2) -0.002(2) 
C3 0.025(3) 0.030(3) 0.020(3) -0.002(3) 0.007(2) -0.013(3) 
C4 0.006(3) 0.042(4) 0.021(3) 0.002(3) 0.000(2) -0.004(3) 
C5 0.010(3) 0.028(3) 0.022(3) -0.002(2) 0.005(2) 0.006(2) 
C6 0.008(3) 0.022(3) 0.012(3) 0.001(2) 0.002(2) 0.004(2) 
C7 0.016(3) 0.017(3) 0.011(3) 0.000(2) 0.005(2) 0.006(2) 
C8 0.022(3) 0.019(3) 0.017(3) 0.002(2) -0.001(2) -0.002(3) 
C9 0.018(3) 0.019(3) 0.018(3) -0.003(2) 0.001(2) 0.003(2) 
C10 0.025(3) 0.014(3) 0.023(3) -0.003(2) 0.004(2) 0.001(2) 
C11 0.017(3) 0.016(3) 0.022(3) 0.000(2) 0.004(2) -0.001(2) 
C12 0.020(3) 0.022(3) 0.017(3) 0.002(2) 0.005(2) -0.005(2) 
C13 0.023(3) 0.024(3) 0.026(3) -0.001(2) 0.002(2) 0.007(3) 
C14 0.016(3) 0.035(4) 0.030(3) -0.002(3) -0.004(2) -0.003(3) 
C15 0.025(3) 0.036(4) 0.043(4) 0.002(3) -0.001(3) -0.012(3) 
C16 0.030(3) 0.018(3) 0.037(3) -0.003(3) -0.004(3) 0.001(3) 
C17 0.011(3) 0.022(3) 0.022(3) 0.001(2) 0.003(2) -0.007(2) 
C18 0.024(3) 0.026(3) 0.032(3) -0.007(3) 0.007(3) -0.002(3) 
C19 0.032(4) 0.032(4) 0.051(4) -0.005(3) 0.009(3) -0.007(3) 
C20 0.044(4) 0.024(4) 0.062(5) -0.021(3) 0.015(4) -0.012(3) 
C21 0.032(4) 0.059(5) 0.032(4) -0.026(3) 0.010(3) -0.007(3) 
C22 0.029(3) 0.028(3) 0.027(3) -0.008(3) 0.006(3) -0.001(3) 
C23 0.014(3) 0.022(3) 0.010(3) 0.001(2) 0.007(2) 0.001(2) 
C24 0.021(3) 0.025(3) 0.014(3) 0.001(2) 0.005(2) -0.005(2) 
C25 0.010(3) 0.040(4) 0.023(3) 0.003(3) 0.000(2) -0.003(3) 
C26 0.017(3) 0.034(4) 0.031(3) 0.001(3) 0.001(2) 0.008(3) 
C27 0.029(3) 0.023(3) 0.032(3) 0.008(3) -0.002(3) 0.008(3) 
C28 0.019(3) 0.022(3) 0.028(3) -0.002(2) 0.003(2) -0.004(2) 
C29 0.011(3) 0.017(3) 0.019(3) 0.008(2) 0.002(2) 0.003(2) 
C30 0.028(3) 0.017(3) 0.018(3) 0.002(2) 0.008(2) 0.001(2) 
C31 0.024(3) 0.030(3) 0.020(3) 0.002(3) 0.015(2) 0.005(3) 
C32 0.022(3) 0.028(3) 0.027(3) 0.008(3) 0.011(2) -0.010(3) 
C33 0.027(3) 0.028(3) 0.028(3) -0.008(3) 0.000(3) -0.007(3) 
C34 0.019(3) 0.023(3) 0.019(3) -0.003(2) 0.005(2) -0.005(2) 
C35 0.017(3) 0.016(3) 0.016(3) 0.005(2) 0.007(2) 0.003(2) 
C36 0.021(3) 0.029(3) 0.016(3) 0.004(2) 0.006(2) 0.004(2) 
C37 0.021(3) 0.036(4) 0.022(3) 0.005(3) 0.007(2) 0.008(3) 
C38 0.029(3) 0.028(3) 0.027(3) 0.005(3) 0.018(3) 0.010(3) 
C39 0.036(4) 0.023(3) 0.025(3) -0.008(3) 0.006(3) 0.001(3) 
C40 0.024(3) 0.020(3) 0.024(3) -0.001(2) 0.007(2) 0.000(2) 
C41 0.009(2) 0.016(3) 0.018(3) -0.002(2) 0.005(2) 0.001(2) 
C42 0.026(3) 0.019(3) 0.021(3) 0.005(2) -0.002(2) -0.006(2) 
C43 0.031(3) 0.025(3) 0.025(3) 0.003(3) -0.011(3) 0.005(3) 
C44 0.017(3) 0.031(4) 0.022(3) -0.007(3) -0.007(2) 0.000(3) 
C45 0.024(3) 0.023(3) 0.024(3) -0.006(3) 0.005(2) -0.007(3) 
C46 0.021(3) 0.022(3) 0.019(3) 0.001(2) 0.004(2) 0.002(3) 
C47 0.013(3) 0.017(3) 0.018(3) 0.000(2) -0.005(2) 0.001(2) 
C48 0.022(3) 0.021(3) 0.019(3) 0.003(2) 0.005(2) -0.001(2) 
C49 0.023(3) 0.018(3) 0.028(3) -0.005(2) -0.004(2) 0.005(2) 
C50 0.027(3) 0.015(3) 0.029(3) 0.005(2) -0.005(3) -0.003(3) 
C51 0.024(3) 0.025(3) 0.027(3) 0.005(3) 0.006(2) -0.011(3) 
C52 0.020(3) 0.022(3) 0.020(3) 0.002(2) 0.008(2) -0.001(2) 
 
_geom_special_details 
; 
 All esds (except the esd in the dihedral angle between two l.s. planes) 
 are estimated using the full covariance matrix.  The cell esds are taken 
 into account individually in the estimation of esds in distances, angles 
 and torsion angles; correlations between esds in cell parameters are only 
 used when they are defined by crystal symmetry.  An approximate (isotropic) 
 treatment of cell esds is used for estimating esds involving l.s. planes. 
; 
 
loop_ 
 _geom_bond_atom_site_label_1 
 _geom_bond_atom_site_label_2 
 _geom_bond_distance 
 _geom_bond_site_symmetry_2 
 _geom_bond_publ_flag 
Pd1 C1 1.994(5) . ? 
Pd1 P1 2.3306(13) . ? 
Pd1 P2 2.3389(12) . ? 
Pd1 I1 2.6682(5) . ? 
P1 C17 1.812(5) . ? 
P1 C29 1.830(5) . ? 
P1 C23 1.831(5) . ? 
P2 C41 1.821(5) . ? 
P2 C47 1.824(5) . ? 
P2 C35 1.832(5) . ? 
N1 C7 1.296(6) . ? 
N1 C9 1.407(6) . ? 
O1 C8 1.203(5) . ? 
O2 C8 1.378(6) . ? 
O2 C7 1.389(5) . ? 
C1 C2 1.392(6) . ? 
C1 C6 1.403(6) . ? 
C2 C3 1.395(7) . ? 
C2 H2A 0.9500 . ? 
C3 C4 1.376(7) . ? 
C3 H3A 0.9500 . ? 
C4 C5 1.365(7) . ? 
C4 H4A 0.9500 . ? 
C5 C6 1.407(6) . ? 
C5 H5A 0.9500 . ? 
C6 C7 1.453(6) . ? 
C8 C9 1.460(7) . ? 
C9 C10 1.343(6) . ? 
C10 C11 1.450(7) . ? 
C10 H10A 0.9500 . ? 
C11 C12 1.386(7) . ? 
C11 C16 1.391(7) . ? 
C12 C13 1.381(7) . ? 
C12 H12A 0.9500 . ? 
C13 C14 1.363(7) . ? 
C13 H13A 0.9500 . ? 
C14 C15 1.372(7) . ? 
C14 H14A 0.9500 . ? 
C15 C16 1.377(7) . ? 
C15 H15A 0.9500 . ? 
C16 H16A 0.9500 . ? 
C17 C18 1.376(7) . ? 
C17 C22 1.397(7) . ? 
C18 C19 1.391(7) . ? 
C18 H18A 0.9500 . ? 
C19 C20 1.359(8) . ? 
C19 H19A 0.9500 . ? 
C20 C21 1.367(8) . ? 
C20 H20A 0.9500 . ? 
C21 C22 1.387(7) . ? 
C21 H21A 0.9500 . ? 
C22 H22A 0.9500 . ? 
C23 C24 1.386(7) . ? 
C23 C28 1.391(6) . ? 
C24 C25 1.381(7) . ? 
C24 H24A 0.9500 . ? 
C25 C26 1.378(7) . ? 
C25 H25A 0.9500 . ? 
C26 C27 1.358(7) . ? 
C26 H26A 0.9500 . ? 
C27 C28 1.382(7) . ? 
C27 H27A 0.9500 . ? 
C28 H28A 0.9500 . ? 
C29 C34 1.376(7) . ? 
C29 C30 1.385(6) . ? 
C30 C31 1.382(7) . ? 
C30 H30A 0.9500 . ? 
C31 C32 1.375(7) . ? 
C31 H31A 0.9500 . ? 
C32 C33 1.371(7) . ? 
C32 H32A 0.9500 . ? 
C33 C34 1.388(7) . ? 
C33 H33A 0.9500 . ? 
C34 H34A 0.9500 . ? 
C35 C40 1.387(7) . ? 
C35 C36 1.389(7) . ? 
C36 C37 1.384(6) . ? 
C36 H36A 0.9500 . ? 
C37 C38 1.370(7) . ? 
C37 H37A 0.9500 . ? 
C38 C39 1.372(7) . ? 
C38 H38A 0.9500 . ? 
C39 C40 1.376(7) . ? 
C39 H39A 0.9500 . ? 
C40 H40A 0.9500 . ? 
C41 C42 1.384(6) . ? 
C41 C46 1.390(6) . ? 
C42 C43 1.386(7) . ? 
C42 H42A 0.9500 . ? 
C43 C44 1.390(7) . ? 
C43 H43A 0.9500 . ? 
C44 C45 1.367(7) . ? 
C44 H44A 0.9500 . ? 
C45 C46 1.379(7) . ? 
C45 H45A 0.9500 . ? 
C46 H46A 0.9500 . ? 
C47 C52 1.378(6) . ? 
C47 C48 1.403(6) . ? 
C48 C49 1.373(7) . ? 
C48 H48A 0.9500 . ? 
C49 C50 1.372(7) . ? 
C49 H49A 0.9500 . ? 
C50 C51 1.363(7) . ? 
C50 H50A 0.9500 . ? 
C51 C52 1.378(7) . ? 
C51 H51A 0.9500 . ? 
C52 H52A 0.9500 . ? 
 
loop_ 
 _geom_angle_atom_site_label_1 
 _geom_angle_atom_site_label_2 
 _geom_angle_atom_site_label_3 
 _geom_angle 
 _geom_angle_site_symmetry_1 
 _geom_angle_site_symmetry_3 
 _geom_angle_publ_flag 
C1 Pd1 P1 85.51(13) . . ? 
C1 Pd1 P2 88.56(13) . . ? 
P1 Pd1 P2 167.76(5) . . ? 
C1 Pd1 I1 173.81(14) . . ? 
P1 Pd1 I1 90.54(3) . . ? 
P2 Pd1 I1 94.41(3) . . ? 
C17 P1 C29 108.1(2) . . ? 
C17 P1 C23 103.9(2) . . ? 
C29 P1 C23 100.8(2) . . ? 
C17 P1 Pd1 108.98(16) . . ? 
C29 P1 Pd1 115.92(16) . . ? 
C23 P1 Pd1 118.11(15) . . ? 
C41 P2 C47 102.1(2) . . ? 
C41 P2 C35 102.8(2) . . ? 
C47 P2 C35 104.3(2) . . ? 
C41 P2 Pd1 114.33(15) . . ? 
C47 P2 Pd1 110.38(16) . . ? 
C35 P2 Pd1 120.86(15) . . ? 
C7 N1 C9 105.4(4) . . ? 
C8 O2 C7 105.9(4) . . ? 
C2 C1 C6 117.4(4) . . ? 
C2 C1 Pd1 119.4(3) . . ? 
C6 C1 Pd1 123.2(3) . . ? 
C1 C2 C3 121.8(5) . . ? 
C1 C2 H2A 119.1 . . ? 
C3 C2 H2A 119.1 . . ? 
C4 C3 C2 119.7(5) . . ? 
C4 C3 H3A 120.2 . . ? 
C2 C3 H3A 120.2 . . ? 
C5 C4 C3 120.1(5) . . ? 
C5 C4 H4A 119.9 . . ? 
C3 C4 H4A 119.9 . . ? 
C4 C5 C6 120.7(5) . . ? 
C4 C5 H5A 119.6 . . ? 
C6 C5 H5A 119.6 . . ? 
C1 C6 C5 120.3(4) . . ? 
C1 C6 C7 121.2(4) . . ? 
C5 C6 C7 118.5(4) . . ? 
N1 C7 O2 115.1(4) . . ? 
N1 C7 C6 129.9(4) . . ? 
O2 C7 C6 115.0(4) . . ? 
O1 C8 O2 121.8(5) . . ? 
O1 C8 C9 132.6(5) . . ? 
O2 C8 C9 105.5(4) . . ? 
C10 C9 N1 131.3(5) . . ? 
C10 C9 C8 120.6(5) . . ? 
N1 C9 C8 108.1(4) . . ? 
C9 C10 C11 132.6(5) . . ? 
C9 C10 H10A 113.7 . . ? 
C11 C10 H10A 113.7 . . ? 
C12 C11 C16 117.9(5) . . ? 
C12 C11 C10 123.8(5) . . ? 
C16 C11 C10 118.3(4) . . ? 
C13 C12 C11 120.4(5) . . ? 
C13 C12 H12A 119.8 . . ? 
C11 C12 H12A 119.8 . . ? 
C14 C13 C12 121.0(5) . . ? 
C14 C13 H13A 119.5 . . ? 
C12 C13 H13A 119.5 . . ? 
C13 C14 C15 119.4(5) . . ? 
C13 C14 H14A 120.3 . . ? 
C15 C14 H14A 120.3 . . ? 
C14 C15 C16 120.4(5) . . ? 
C14 C15 H15A 119.8 . . ? 
C16 C15 H15A 119.8 . . ? 
C15 C16 C11 120.9(5) . . ? 
C15 C16 H16A 119.5 . . ? 
C11 C16 H16A 119.5 . . ? 
C18 C17 C22 118.3(5) . . ? 
C18 C17 P1 119.4(4) . . ? 
C22 C17 P1 122.2(4) . . ? 
C17 C18 C19 120.8(5) . . ? 
C17 C18 H18A 119.6 . . ? 
C19 C18 H18A 119.6 . . ? 
C20 C19 C18 120.5(6) . . ? 
C20 C19 H19A 119.8 . . ? 
C18 C19 H19A 119.8 . . ? 
C19 C20 C21 119.7(6) . . ? 
C19 C20 H20A 120.1 . . ? 
C21 C20 H20A 120.1 . . ? 
C20 C21 C22 120.8(6) . . ? 
C20 C21 H21A 119.6 . . ? 
C22 C21 H21A 119.6 . . ? 
C21 C22 C17 119.9(5) . . ? 
C21 C22 H22A 120.1 . . ? 
C17 C22 H22A 120.1 . . ? 
C24 C23 C28 118.1(5) . . ? 
C24 C23 P1 120.7(4) . . ? 
C28 C23 P1 121.1(4) . . ? 
C25 C24 C23 120.8(5) . . ? 
C25 C24 H24A 119.6 . . ? 
C23 C24 H24A 119.6 . . ? 
C26 C25 C24 120.2(5) . . ? 
C26 C25 H25A 119.9 . . ? 
C24 C25 H25A 119.9 . . ? 
C27 C26 C25 119.4(5) . . ? 
C27 C26 H26A 120.3 . . ? 
C25 C26 H26A 120.3 . . ? 
C26 C27 C28 121.2(5) . . ? 
C26 C27 H27A 119.4 . . ? 
C28 C27 H27A 119.4 . . ? 
C27 C28 C23 120.2(5) . . ? 
C27 C28 H28A 119.9 . . ? 
C23 C28 H28A 119.9 . . ? 
C34 C29 C30 119.9(4) . . ? 
C34 C29 P1 116.2(4) . . ? 
C30 C29 P1 123.6(4) . . ? 
C31 C30 C29 119.2(5) . . ? 
C31 C30 H30A 120.4 . . ? 
C29 C30 H30A 120.4 . . ? 
C32 C31 C30 121.0(5) . . ? 
C32 C31 H31A 119.5 . . ? 
C30 C31 H31A 119.5 . . ? 
C33 C32 C31 119.7(5) . . ? 
C33 C32 H32A 120.1 . . ? 
C31 C32 H32A 120.1 . . ? 
C32 C33 C34 119.9(5) . . ? 
C32 C33 H33A 120.0 . . ? 
C34 C33 H33A 120.0 . . ? 
C29 C34 C33 120.3(5) . . ? 
C29 C34 H34A 119.9 . . ? 
C33 C34 H34A 119.9 . . ? 
C40 C35 C36 117.7(4) . . ? 
C40 C35 P2 121.5(4) . . ? 
C36 C35 P2 120.8(4) . . ? 
C37 C36 C35 121.2(5) . . ? 
C37 C36 H36A 119.4 . . ? 
C35 C36 H36A 119.4 . . ? 
C38 C37 C36 119.9(5) . . ? 
C38 C37 H37A 120.0 . . ? 
C36 C37 H37A 120.0 . . ? 
C37 C38 C39 119.6(5) . . ? 
C37 C38 H38A 120.2 . . ? 
C39 C38 H38A 120.2 . . ? 
C38 C39 C40 120.6(5) . . ? 
C38 C39 H39A 119.7 . . ? 
C40 C39 H39A 119.7 . . ? 
C39 C40 C35 120.9(5) . . ? 
C39 C40 H40A 119.5 . . ? 
C35 C40 H40A 119.5 . . ? 
C42 C41 C46 119.0(4) . . ? 
C42 C41 P2 122.9(4) . . ? 
C46 C41 P2 118.1(4) . . ? 
C41 C42 C43 119.8(5) . . ? 
C41 C42 H42A 120.1 . . ? 
C43 C42 H42A 120.1 . . ? 
C42 C43 C44 120.4(5) . . ? 
C42 C43 H43A 119.8 . . ? 
C44 C43 H43A 119.8 . . ? 
C45 C44 C43 119.9(5) . . ? 
C45 C44 H44A 120.0 . . ? 
C43 C44 H44A 120.0 . . ? 
C44 C45 C46 119.8(5) . . ? 
C44 C45 H45A 120.1 . . ? 
C46 C45 H45A 120.1 . . ? 
C45 C46 C41 121.0(5) . . ? 
C45 C46 H46A 119.5 . . ? 
C41 C46 H46A 119.5 . . ? 
C52 C47 C48 118.5(5) . . ? 
C52 C47 P2 124.4(4) . . ? 
C48 C47 P2 116.8(4) . . ? 
C49 C48 C47 120.4(5) . . ? 
C49 C48 H48A 119.8 . . ? 
C47 C48 H48A 119.8 . . ? 
C50 C49 C48 119.7(5) . . ? 
C50 C49 H49A 120.1 . . ? 
C48 C49 H49A 120.1 . . ? 
C51 C50 C49 120.5(5) . . ? 
C51 C50 H50A 119.7 . . ? 
C49 C50 H50A 119.7 . . ? 
C50 C51 C52 120.4(5) . . ? 
C50 C51 H51A 119.8 . . ? 
C52 C51 H51A 119.8 . . ? 
C51 C52 C47 120.3(5) . . ? 
C51 C52 H52A 119.8 . . ? 
C47 C52 H52A 119.8 . . ? 
 
_diffrn_measured_fraction_theta_max    0.999 
_diffrn_reflns_theta_full              25.00 
_diffrn_measured_fraction_theta_full   0.999 
_refine_diff_density_max    0.703 
_refine_diff_density_min   -0.493 
_refine_diff_density_rms    0.116  


#===END
